# Supplementary material for: Retrospective study of intrapartum fever in term pregnancies and adverse obstetric and neonatal outcomes
Source: PeerJ. 2022 Oct 27;10:e14242. doi: 10.7717/peerj.14242 (PMC9618262; doi:10.7717/peerj.14242)
Supplement: Data S1 [file peerj-10-14242-s003.xlsx]

## Sheet: Sheet1
Maternal Number	Peak fever temperature	Newborn birth weight	Education	Parity	Mode of delivery (0: delivery; 1: side cut; 2: midwifery; 3: Cesarean section)	Whether to be transferred to NICU treatment (0: not transferred;1: septicemia;2: hyperbilirubinemia;3: asphyxiation;4: pneumonia;5: neonatal meconium aspiration syndrome;6: hypoglycemia;7: Ingestion syndrome)	neonatal asphyxia（0：no；1：yes）	Gestational week(1:37 weeks-39 weeks;2:≥40 weeks)	Maternal age (1:20-34 years;2:35-45 years)	Epidural（0:No；1:Yes）	Premature rupture of membranes（0：＜18 hours；1：≥18 hours）	Phase 2( minute)	Phase 3, min	Diabetes mellitus	Hypertension	Hypothyroidism	1-min Apgar（0: 8-10 points；1: 4-7points；2:0-3points）	Placental pathologic（0:normal，1:histological chorioamnionitis）	Neonatal sepsis(0:No;1:Yes)	Newborn gender (0:Female; 1:Male)	Amniotic fluid shape (0: clear;1: I °;2: II °;3: III °)	Amniotic fluid shape III °（0：NO；1：Yes）	PT	APTT	BMI	GBS	WBC before delivery (×10*9/L)	CRP before delivery (mg/L)	WBC after delivery(×10*9/L)	CRP after delivery (mg/L)	NC before delivery (×10*9/L)	NC after delivery (×10*9/L)
1	37.5	3820	Trade school	1	1	5	0	2	1	1	0.1375	36	7	0	0	0	0	0	0	1	3	1	9.9	26.3	28.08	0	13	10.7	13.6	80.57	11.2	11.3
2	37.5	3460	University graduate	1	1	2	0	2	1	1	0	90	5	0	0	0	0	0	0	0	0	0	10.3	27.3	19.26	0	6.5	2.71	10.3	22.36	4	7
3	37.5	3500	Trade school	1	3	0	0	1	1	1	0	39	11	0	0	0	0	0	0	0	0	0	10.5	24.8	27.28	0	16	14.2	16.3	160	13.8	14.5
4	37.5	2920	University graduate	1	1	0	0	2	1	1	0	159	16	0	0	0	0	0	0	1	0	0	11.2	26.3	25.59	0	13.5	7.74	16.7	75.97	11.4	13.9
5	37.5	3760	University graduate	1	1	0	0	2	1	0	0	113	7	0	0	0	0	0	0	0	0	0	11.3	26.1	25.43	0	20.9	1.73	15.5	46.92	18.9	12.1
6	37.5	3450	Trade school	2	0	0	0	1	2	0	0	9	6	0	0	1	0	0	0	1	0	0	10.2	24.1	29.62	0	8.5	11.26	7.8	31.64	6.6	5.3
7	37.6	3300	University graduate	1	1	0	0	1	1	0	1	155	5	0	0	0	0	0	0	0	0	0	9.1	23.3	27.91	0	8	5.14	10.1	50.79	5.7	7.7
8	37.6	3790	University graduate	1	2	2	0	1	1	1	0.21875	155	10	0	0	1	0	0	0	0	0	0	9.9	26.6	25.46	0	8.5	1.54	7.7	26.09	6.3	5.8
9	37.6	3230	Trade school	1	0	2	0	1	1	1	1	17	14	1	0	0	0	0	0	0	0	0	10.7	25.9	33.59	0	18.3	9.2	12.3	73.1	15.3	9.7
10	37.6	3620	University graduate	1	0	0	0	2	1	0	0.122222	106	9	0	0	0	0	0	0	0	2	0	9.8	25.6	32.4	0	13.2	2.13	12.8	55.42	10.9	10.2
11	37.6	3470	University graduate	1	0	0	0	1	1	0	0.0166667	44	16	0	1	0	0	0	0	0	0	0	10.4	25.8	26.32	0	8.7	1.09	8.4	16.54	7.2	6.4
12	37.6	3270	University graduate	1	1	0	0	1	1	1	0.0576389	83	18	1	0	0	0	0	0	1	0	0	11.2	24.7	27.94	0	7.8	4	9.7	52.7	5.9	6.7
13	37.6	3130	University graduate	1	0	0	0	1	1	0	0	119	16	0	0	1	0	0	0	1	0	0	9.9	21.3	23.18	0	10.1	1.5	15	32	7.7	12
14	37.6	2370	University graduate	1	1	0	0	1	1	1	0.0368056	133	17	1	0	0	0	0	0	0	0	0	11	29.1	24.95	0	9.3	3.43	13.7	59.2	7.5	12.1
15	37.6	3140	University graduate	1	0	0	0	1	1	0	0.0958333	73	17	0	0	0	0	0	0	1	0	0	10.2	24.7	24.78	0	10.5	0.58	13.7	53.58	8.7	10.9
16	37.6	3440	University graduate	1	0	0	0	2	1	0	0.0569444	62	8	0	0	0	0	0	0	1	0	0	9.3	23	21.82	0	5.8	1.32	13	15.21	4	8.7
17	37.6	3300	University graduate	1	0	0	0	1	1	1	0.105556	62	13	0	0	0	0	0	0	1	0	0	10.6	27.2	26.1	0	5.2	28.79	12.9	76.85	3.5	8.6
18	37.6	3200	University graduate	1	0	3	1	1	1	1	0.0305556	64	6	0	0	0	1	0	0	1	0	0	11.1	24.1	25.43	0	7.4	2.67	11.9	97.15	5.5	9.1
19	37.6	3540	University graduate	1	1	2	0	2	1	1	0.236806	101	9	0	0	0	0	0	0	0	2	0	11.3	28.8	29.52	0	7.9	8.52	13.1	92.49	6.2	10.9
20	37.6	4040	University graduate	1	2	0	0	2	1	1	1	239	6	0	0	0	0	0	0	1	0	0	9.8	28	24.27	0	6.9	1.73	14.7	63.03	5	11.3
21	37.6	3280	University graduate	1	0	0	0	1	1	1	0.0298611	43	7	0	0	0	0	0	0	1	1	0	11	25.1	24.39	0	16.6	11.29	9.7	29.24	14	6.6
22	37.6	3430	University graduate	1	1	2	0	1	1	1	1	115	10	0	1	0	0	0	0	1	0	0	10.1	28.4	25.58	0	7.8	1.27	13	57.79	5.6	10.3
23	37.6	3850	University graduate	1	3	0	0	2	1	1	1	33	7	1	0	0	0	0	0	1	0	0	11.5	27	25.97	0	11.6	58.82	9.8	98.23	9.1	6.8
24	37.6	3600	University graduate	1	3	0	0	1	1	1	0.475	112	3	0	0	1	0	0	0	1	2	0	10.8	25.7	26.53	0	7.8	7.94	12.3	104.8	6.5	10.6
25	37.6	3210	University graduate	1	0	0	0	1	1	1	0.0291667	32	8	0	0	0	0	0	0	0	0	0	12.3	26.2	24.67	0	7.6	1.06	11.8	36.19	6	9
26	37.6	3440	Master	1	0	0	0	2	1	1	0.0604167	32	18	0	0	0	0	0	0	0	0	0	10.5	26.6	21.64	0	6.7	1.73	10.7	22.85	4.9	8.4
27	37.6	3280	Master	1	0	0	0	2	1	1	0.0472222	68	12	0	0	1	0	0	0	1	0	0	11.6	28.5	27.8	0	12.3	2.15	15.7	54.22	10.1	13.8
28	37.6	3050	University graduate	1	0	0	0	1	1	1	0.979167	60	15	0	0	0	0	0	0	0	0	0	9.4	26.8	23.71	0	8.6	2.54	14.4	52.09	6	11.6
29	37.6	3290	University graduate	1	0	0	0	2	1	1	1	32	18	0	0	0	0	0	0	0	0	0	11.1	24.5	27.81	0	10.6	28.33	12.4	67.29	8.9	9.6
30	37.6	3130	University graduate	1	2	0	0	1	1	0	0.156944	16	9	0	0	1	0	0	0	0	3	1	11.1	23.8	26.83	0	12.9	1.57	11	32.99	10.4	8.4
31	37.6	3460	Trade school	1	0	0	0	1	1	1	0.0430556	62	8	0	0	0	0	0	0	0	2	0	11.5	34.8	27.55	0	8.2	5.5	10.4	36.7	6.5	8.1
32	37.6	3560	University graduate	1	1	0	0	1	1	1	0.142361	141	5	0	0	0	0	0	0	1	1	0	10.2	27.6	24.72	0	11.1	13	11.5	66	10.1	9.3
33	37.6	3650	University graduate	1	3	0	0	1	1	1	0.988889	161	4	0	0	0	0	0	0	1	0	0	10.8	29.3	33.62	0	11.7	3.3	13.3	48	8.9	10.7
34	37.6	4130	University graduate	1	1	0	0	1	1	0	0.331944	62	7	0	0	0	0	0	0	1	0	0	10.1	23	26.74	0	60	5.14	10.7	43.94	4.1	8
35	37.6	3550	University graduate	1	1	0	0	1	1	0	1	30	5	0	0	0	0	0	0	0	0	0	11.4	32.7	26.43	1	6.6	6.83	15.9	27.13	5	13.5
36	37.6	3370	University graduate	1	1	2	0	1	1	0	0.14375	62	8	0	0	0	0	0	0	0	3	1	11	26.7	24.6	0	16.5	4.95	9.8	39.45	15	7.8
37	37.6	4150	University graduate	1	3	0	0	2	1	1	0.854167	34	7	0	0	0	0	1	0	0	3	1	11.2	31.3	29.01	0	16	10.5	14.7	59.2	13.7	12.2
38	37.6	3150	University graduate	1	1	0	0	1	1	0	0.414583	27	18	0	0	0	0	0	0	1	0	0	10.1	25.5	22.63	0	14.5	3.37	15.5	27.88	12.4	12.7
39	37.6	3380	Trade school	3	0	0	0	1	2	0	0.173611	11	9	0	0	0	0	0	0	0	0	0	10.2	21.4	28.44	0	8.6	3.57	7.9	21.34	7.2	6
40	37.6	3390	University graduate	2	0	0	0	1	2	0	0.00625	9	6	1	0	0	0	0	0	0	0	0	11	25.2	25.86	0	10.8	0.63	7.4	4.53	9.2	5.6
41	37.6	2730	University graduate	1	1	0	0	2	1	0	0.0131944	59	6	0	0	0	0	0	0	0	3	1	11.4	27.1	26.56	0	9.5	3.46	9.7	35.65	8	6.9
42	37.6	2710	University graduate	1	0	0	0	1	1	0	0	46	7	0	0	0	0	0	0	0	0	0	10.4	27	26.95	0	7.5	4.31	11.1	26.15	6.2	9.2
43	37.6	2850	University graduate	1	3	0	0	1	1	0	0	0	0	0	0	0	0	0	0	0	0	0	11.6	24.3	20.6		22.1	10.78	15.6	95.2
44	37.6	3250	University graduate	1	0	0	0	1	1	0	0	59	21	0	0	0	0	0	0	0	0	0	10.4	26.4	19.1		7.1	4	10.4	29.09
45	37.6	2710	University graduate	1	1	2	0	1	1	0	0	101	4	0	0	0	0	0	0	0	0	0	11.3	25.3	18.4		10	5.37	10.2	60.72
46	37.7	3440	University graduate	1	1	0	0	2	1	1	0.365278	111	9	0	0	1	0	0	0	0	0	0	11	26.3	26.95	0	17.1	35.8	9.9	53.1	8.7	6.7
47	37.7	2550	University graduate	1	3	2	0	1	1	1	1	60	10	0	0	1	0	0	0	0	0	0	10.4	27.5	26.03	0	21.2	84.12	14	150.66	19.1	11.9
48	37.7	3030	Trade school	1	0	0	0	2	1	0	0.144444	28	7	0	0	0	0	0	0	0	2	0	10.1	20.3	28.56	0	9.1	2.59	11.1	16.29	7.2	7.6
49	37.7	2900	University graduate	1	0	0	0	1	1	0	0.186111	38	7	0	0	0	0	0	0	0	0	0	9.7	24.4	26.91	0	8	2.86	11.2	49.38	5.8	8.1
50	37.7	3100	University graduate	2	0	0	0	1	1	0	0	16	9	1	0	0	0	0	0	0	0	0	10.5	26.4	28.06	0	11.7	25.3	13.5	49.1	10.3	10.8
51	37.7	3190	University graduate	1	2	0	0	1	1	1	0.470833	38	2	0	1	0	0	0	0	0	0	0	11.5	27.1	28.5	0	8.7	3.85	12.8	79	6.3	9.9
52	37.7	3580	University graduate	1	1	0	0	1	1	0	0.184722	83	2	0	0	0	0	0	0	0	3	1	10.1	25	30.84	0	8.8	23.24	7.3	51.31	7.2	5.8
53	37.7	4000	University graduate	1	3	0	0	2	2	0	1	83	18	0	0	0	0	0	0	0	0	0	11.4	25.3	27.7	0	15.9	6.8	16.4	104.3	14.9	14.4
54	37.7	4150	University graduate	1	3	0	0	2	1	1	0.46875	116	4	0	0	1	0	0	0	0	3	1	10.7	23	36.71	0	11.1	5.67	17.2	161.89	8.7	14.2
55	37.7	3420	University graduate	2	0	0	0	2	1	0	0	9	6	0	0	0	0	0	0	1	0	0	10.7	24.7	25.4	0	6.6	2.83	7.8	9.84	4.1	4.4
56	37.7	3120	University graduate	1	0	0	0	2	1	1	0.151389	73	7	0	0	1	0	0	0	1	0	0	9.9	31.4	27.58	0	10.2	24.43	10.7	52.77	7.7	8.9
57	37.7	3250	University graduate	1	3	0	0	1	1	0	0.402083	94	7	1	0	0	0	1	0	1	3	1	10.7	22.8	29.29	0	11	39.63	9.9	160	9.6	7.9
58	37.7	3200	University graduate	1	1	0	0	2	2	1	0.151389	63	12	0	0	0	0	0	0	0	2	0	11.1	23.7	24.6	0	10.5	4.35	12.3	109.68	8.8	9.4
59	37.7	3900	Doctor	1	0	0	0	2	1	1	0.257639	161	19	0	0	0	0	0	0	0	0	0	11.1	23.5	24.95	0	8.6	0.3	16.6	60.11	7	14
60	37.7	3550	University graduate	1	0	2	0	2	1	1	0.425	162	33	0	0	0	0	0	0	0	0	0	10.5	25.4	25.5	0	9	2.15	13.8	62.52	7.4	11.4
61	37.7	3700	University graduate	1	3	0	0	2	1	1	0.363889	32	18	0	0	0	0	0	0	1	0	0	11.3	29.7	23.61	0	5.5	0.4	14.4	32.58	3.9	12
62	37.7	3750	University graduate	1	0	0	0	2	1	1	0.406944	86	14	0	0	0	0	0	0	1	0	0	10.6	25.5	24.51	0	8.3	1.3	12.9	69.51	6.5	10.7
63	37.7	3750	Master	1	3	2	0	2	1	1	0	43	7	0	0	0	0	0	0	0	0	0	11.1	23.7	23.05	0	14.3	59.27	13.5	160	13.4	12
64	37.7	3210	University graduate	1	1	0	0	2	1	1	0.0659722	170	10	0	0	0	0	0	0	0	0	0	10.5	28.5	24.06	0	6.4	5.15	9.3	23.6	5.1	7.4
65	37.7	3290	Trade school	1	0	0	0	2	1	1	0.164583	117	8	0	0	0	0	0	0	0	2	0	10.2	24	22.69	0	8.3	3.47	12.3	51.36	6.3	9.9
66	37.7	3400	University graduate	1	1	2	0	1	1	1	0	117	13	0	0	0	0	0	0	1	1	0	11	26.3	28.3	0	9.7	7.79	23	72.6	7.7	20.5
67	37.7	2790	University graduate	2	0	0	0	1	1	0	0.00486111	7	8	0	0	0	0	0	0	0	0	0	10.7	26.4	25.27	0	10	2.86	9.8	11.14	7.5	7
68	37.7	3260	Trade school	1	1	0	0	1	1	0	0.0819444	83	7	0	0	0	0	0	0	0	3	1	10.9	25	32.02	0	7.1	4	11.6	21.4	5.4	9.8
69	37.7	3620	University graduate	1	1	0	0	1	1	1	0.205556	53	7	0	0	0	0	0	0	1	0	0	9.9	27.3	28.06	0	9.2	6.6	13.5	41.6	6.5	9.7
70	37.7	2640	University graduate	1	0	0	0	1	1	1	0.239583	70	15	0	0	0	0	0	0	1	0	0	10.2	26.6	24.38	0	7.3	13.18	9.1	91.54	5	6.6
71	37.7	2850	University graduate	1	0	0	0	1	1	0	0	30	20	0	0	0	0	0	0	0	0	0	11.2	21.7	29.04	0	9.1	12.53	9.9	41.71	6.7	6.8
72	37.7	2890	University graduate	1	0	0	0	1	1	0	0.0166667	24	6	0	0	0	0	0	0	0	0	0	10.5	25.4	24.98	0	7.4	3.5	7.4	30.08	5.1	5.1
73	37.7	2970	University graduate	1	3	4	0	1	1	0	0	0	0	1	0	0	0	1	0	1	0	0	11.2	25.5	30.3		16.5	70.87	12.7	140.58
74	37.7	3100	University graduate	1	1	0	0	1	1	0	0	27	3	0	0	1	0	0	0	0	0	0	11.3	24.7	22.3		11.8	3.55	10.4	35.1
75	37.7	3830	University graduate	1	1	0	0	1	1	1	0	93	12	1	0	0	0	0	0	1	3	1	10.2	27.9	20.2		9.2	16.14	15	104.03
76	37.7	3300	University graduate	2	0	0	0	1	2	0	0	30	20	0	0	0	0	0	0	0	0	0	9.9	24.2	19		8.7	3.93	12.8	47.61
77	37.7	3190	University graduate	1	0	0	0	2	1	0	0	38	7	0	0	1	0	0	0	0	3	1	10.6	26.2	20.5		15.2	37.76	13.3	48.9
78	37.8	3070	University graduate	1	1	0	0	1	1	1	0.196528	93	2	0	0	0	0	0	0	1	0	0	10.8	31	24.98	0	8.5	5.95	8.4	37.8	6.5	6.3
79	37.8	3270	University graduate	1	1	0	0	1	1	1	0.34375	107	13	0	0	0	0	0	0	1	0	0	11.3	30.3	26.22	0	13.5	1.4	11.8	60.9	11.4	9.4
80	37.8	2800	Trade school	1	3	0	0	1	1	1	0	155	10	0	0	0	0	1	0	0	3	1	11.5	23.7	28.04	0	8.4	4.82	11.7	184.39	6.7	10
81	37.8	3100	University graduate	1	3	1	0	1	1	1	1	38	7	1	0	0	0	1	1	1	3	1	9.5	23.8	25.07	0	18.3	111	10.8	152.25	16.5	9.1
82	37.8	3710	University graduate	1	0	2	0	1	1	1	0.184722	86	4	0	0	1	0	0	0	0	3	1	9.9	25.2	25.07	0	7.7	2.4	10.5	33.6	5.6	7.8
83	37.8	4000	University graduate	1	1	0	0	1	1	1	0.40625	205	10	0	0	0	0	0	0	0	2	0	10.5	27	26.89	0	10.4	9.45	11.8	79.1	8.4	9.6
84	37.8	3600	University graduate	1	2	0	0	2	1	1	1	176	9	0	0	1	0	0	0	1	3	1	10.5	26.9	28.08	0	19.1	12.39	15.8	98.32	17	12.1
85	37.8	3050	University graduate	1	1	2	0	1	1	1	1	213	2	0	0	0	0	0	0	0	0	0	10.7	25.9	28.08	0	8.3	2.59	9.2	37.99	5.1	6.1
86	37.8	3050	University graduate	1	1	0	0	2	1	1	0	122	23	1	0	0	0	0	0	0	0	0	11	29.7	27.85	0	11.1	33.9	7.9	47.4	9.4	5.6
87	37.8	3700	University graduate	1	3	2	0	2	1	1	0	83	18	1	0	0	0	0	0	0	2	0	10.6	24.9	27.34	0	4.9	2.25	8	67.17	3.5	5.8
88	37.8	3700	University graduate	1	0	0	0	2	1	1	0.279167	112	8	0	0	0	0	0	0	1	0	0	9.9	23.5	27.34	0	10.1	3.54	17.5	83.14	7.7	14.3
89	37.8	3635	University graduate	1	0	2	0	1	1	0	0.0902778	110	10	0	0	0	0	0	0	1	0	0	9.9	22.5	20.82	0	9.4	2.64	7.6	21.01	8.1	6.7
90	37.8	3290	Master	1	0	0	0	2	1	1	0.288889	96	4	1	0	0	0	0	0	0	0	0	10.2	21.5	22.88	0	7.3	0.82	14.3	37.18	5	11.6
91	37.8	3130	Master	1	1	0	0	1	1	1	0	87	18	0	0	0	0	0	0	0	3	1	10.6	24.9	28.76	0	9.7	1.09	11.3	67.67	7.5	8.3
92	37.8	3600	University graduate	1	1	0	0	2	1	1	1	56	4	0	0	0	0	0	0	0	0	0	9.7	23.8	27.23	0	15.4	16.22	18.3	71.3	13.6	15.6
93	37.8	3300	Master	1	0	0	0	1	1	1	0.0777778	112	3	0	0	0	0	0	0	1	0	0	10.3	27	27.18	0	10.7	1.33	16.2	72.67	7.3	13.1
94	37.8	3380	University graduate	1	0	2	0	2	1	1	0.289583	187	8	0	0	0	0	0	0	0	0	0	11	23.8	26.91	0	9.4	1.96	16.8	71.64	7	14
95	37.8	3380	University graduate	1	0	0	0	1	1	1	0	71	9	1	0	0	0	0	0	1	0	0	11.5	24.3	28.35	0	7.8	3.89	11.8	82.98	5.4	9.1
96	37.8	3450	Master	1	0	0	0	1	1	1	0.196528	43	7	0	0	1	0	0	0	1	0	0	11.1	26.2	25.25	0	14.5	16.73	10.4	49.91	13.1	8
97	37.8	3030	Master	1	1	7	0	2	1	1	1	77	8	0	0	0	0	0	0	0	0	0	11.7	25.5	24.6	0	9.4	18.03	11.1	60	7.8	8.4
98	37.8	3950	University graduate	1	3	0	0	2	1	0	0.385417	77	8	0	0	0	0	1	0	0	0	0	11.4	26.4	31.22	0	16.3	38.4	15.5	160	14.4	13.4
99	37.8	3510	University graduate	1	1	1	0	2	1	0	0.0784722	69	16	0	0	0	0	0	1	0	0	0	11.6	24	28.51	1	11.7	5.66	9.7	52.47	9	7.5
100	37.8	3330	University graduate	1	0	0	0	2	1	1	0.00138889	12	8	0	0	0	0	0	0	0	0	0	9.8	20	28.92	0	11.2	14	9.9	74.7	9.3	7.3
101	37.8	3600	University graduate	1	3	0	0	2	1	0	0.238889	255	5	0	0	0	0	0	0	1	3	1	10.5	21.8	29.29	0	13.8	9	16.5	97	12.1	13.6
102	37.8	3820	University graduate	1	1	0	0	2	1	0	0.917361	161	4	0	0	0	0	1	0	0	0	0	10.3	26.7	25.39	0	9.7	4.19	14.3	69.3	7.3	11.3
103	37.8	3680	University graduate	1	1	0	0	2	1	1	0.0701389	101	2	0	0	1	0	0	0	1	1	0	10.8	32.8	23.87	0	9.3	30.62	12.6	44.41	7.9	10.2
104	37.8	3420	University graduate	1	1	0	0	1	1	1	1	169	9	0	0	0	0	0	0	1	2	0	9.8	23.5	25.97	0	11.2	42.8	14.2	42.8	9.2	11.4
105	37.8	4120	University graduate	1	2	1	0	2	2	1	1	236	9	0	0	0	0	1	1	1	3	1	10.8	29.3	27.76	0	14.3	17	15.7	63.25	11.5	11.9
106	37.8	3340	Master	1	1	0	0	1	1	1	1	117	8	0	0	0	0	0	0	1	0	0	10.2	25.7	23.95	0	6.8	3.37	10	69.81	4.9	7.7
107	37.8	3030	University graduate	1	3	2	0	1	1	0	1	30	20	0	0	0	0	1	0	1	0	0	9.6	23.1	25.03	0	18.7	12.5	14.5	66.04	16.8	12.1
108	37.8	3770	University graduate	1	2	0	0	2	1	1	0.474306	33	7	0	0	0	0	1	0	1	0	0	10.3	25.6	24.06	0	7.7	6	13.2	110.33	5.9	10.4
109	37.8	3380	University graduate	1	0	0	0	1	1	1	0.0625	60	5	0	0	0	0	0	0	1	0	0	11.4	27.7	29.4	0	8	4.5	12.9	65.8	6.6	10.7
110	37.8	2970	University graduate	1	0	0	0	2	1	1	0	75	7	0	0	0	0	0	0	0	3	1	10.9	24.3	22.6		9.2	1.9	16.3	96.99
111	37.8	3210	University graduate	1	1	0	0	1	1	1	0	52	7	0	0	0	0	1	0	0	0	0	10.8	23.8	22.3		24.8	27.27	9.1	42.62
112	37.8	3110	University graduate	1	1	0	0	1	1	0	0	94	5	0	0	0	0	0	0	0	3	1	11.1	24.9	17.4		16.1	6	11.5	80.68
113	37.8	3560	University graduate	1	1	0	0	2	1	1	0	93	12	0	0	1	0	0	0	0	0	0	11.3	24.8	15.2		16.6	25.33	13.3	64.89
114	37.8	2910	University graduate	1	1	0	0	1	1	1	1	133	7	0	1	0	0	0	0	0	0	0	11.3	23.5	20		8.9	1.06	13.7	41.75
115	37.8	3750	University graduate	1	3	0	0	2	1	1	0	0	0	1	0	0	0	0	0	1	0	0	11	26.6	22		13.9	11.51	13.7	121.09
116	37.8	3170	University graduate	1	0	0	0	1	1	1	0	59	26	0	0	0	0	0	0	1	0	0	9.3	23.5	20.4		9.7	0.71	11.9	18.58
117	37.8	3010	University graduate	1	1	0	0	1	1	1	0	42	8	1	0	0	0	0	0	1	0	0	9	27.4	19.5		6.6	0.68	12.5	34.73
118	37.8	3050	University graduate	1	0	0	0	2	1	0	0	54	6	0	1	0	0	0	0	0	0	0	9.7	26.1	19.8		11.5	2.55	12.9	39.45
119	37.8	3280	University graduate	1	1	0	0	1	1	1	0	17	6	0	0	0	0	0	0	1	0	0	11.4	24.3	18.2		8.8	6.88	9.7	42.66
120	37.8	3230	University graduate	1	1	2	0	1	1	1	0	40	10	0	0	0	0	1	0	1	3	1	10.7	24.5	20.3		19.1	21.35	23.8	90
121	37.8	3110	University graduate	1	0	1	0	1	1	1	0	34	11	0	0	0	0	0	1	1	0	0	10.7	28.2	19.9		13.6	16.9	13.4	102.61
122	37.8	3150	University graduate	1	3	1	0	2	1	1	1	0	0	0	0	0	0	1	1	0	3	1	10.8	26.9	19.9		8.9	3.45	18.9	160
123	37.8	3180	University graduate	1	2	0	0	2	1	1	0	79	6	0	0	0	0	1	0	1	3	1	11.2	29.2	18.3		5.9	2.64	11.2	22.63
124	37.8	3210	University graduate	1	1	3	1	1	1	1	1	188	7	0	0	1	1	1	0	0	1	0	11.6	29.5	18.7		8.7	3.7	12.4	42.68
125	37.8	3420	University graduate	1	1	0	0	1	1	1	1	96	6	0	1	0	0	0	0	1	0	0	10.3	26.7	22.6		15.4	14.24	14.4	133.85
126	37.8	3450	University graduate	1	3	0	0	2	1	0	0	0	0	0	0	0	0	0	0	1	0	0	10.8	23.7	20.3		20.3	3.72	19.3	151.24
127	37.8	3200	University graduate	1	3	0	0	1	1	0	0	0	0	0	0	0	0	0	0	1	0	0	11.4	27.4	20.7		12.9	12.26	11.9	74.04
128	37.8	3600	University graduate	1	3	4	0	1	1	0	1	0	0	1	0	0	0	0	0	1	3	1	10.4	23.3	20		16.4	47.77	14.8	117.88
129	37.8	3550	University graduate	1	3	1	0	1	1	1	0	0	0	0	1	0	0	0	1	1	3	1	10.6	23	23.9		15.7	10.2	10.4	160
130	37.8	3550	University graduate	1	3	0	0	1	1	0	1	0	0	0	0	0	0	1	0	1	0	0	12	27.6	20.8		18.3	12.35	9.8	71.19
131	37.8	3650	University graduate	1	3	4	0	2	1	0	0	0	0	1	0	0	0	0	0	0	0	0	11.5	24.1	24.9		11	72.54	9.8	125.58
132	37.9	3360	University graduate	1	2	2	0	2	1	1	0.463194	242	8	0	0	0	0	1	0	1	2	0	11	24.9	28.51	0	8.6	5.2	16.3	160	7	14.1
133	37.9	3520	University graduate	1	0	0	0	1	1	1	0.161806	38	7	0	0	0	0	0	0	0	0	0	11	26.4	25	0	17.7	26.69	12.3	61.32	16.3	9.7
134	37.9	3800	University graduate	1	3	0	0	2	1	1	1	155	15	0	0	0	0	0	0	0	0	0	10.8	28.3	25.69	0	4.7	0.89	10.1	138.76	2.9	8
135	37.9	3540	Master	1	0	0	0	2	1	0	0.16875	50	5	0	0	0	0	0	0	0	0	0	11.5	30.4	25.14	0	11.4	20.3	8.7	24.8	9.8	6.4
136	37.9	3360	University graduate	1	1	0	0	2	1	1	0.179167	113	7	0	0	0	0	0	0	1	0	0	9.7	27.8	30.03	0	10.7	11.6	10.5	92	8.9	8.3
137	37.9	2760	University graduate	1	1	2	0	1	1	1	0.310417	122	23	1	0	1	0	0	0	0	1	0	9.5	25.2	25.63	0	10.1	4.76	12.9	35.9	7.5	10
138	37.9	3450	University graduate	1	1	3	1	1	1	1	0	116	4	0	0	0	1	0	0	1	0	0	10.5	27	25.89	0	11.1	3.5	11.7	70.42	8.8	9.4
139	37.9	3570	University graduate	1	0	0	0	2	1	1	0	75	5	1	0	0	0	0	0	1	0	0	9.9	22.3	27.1	0	8.1	0.85	8.9	51	5.7	7
140	37.9	3000	University graduate	1	0	0	0	2	1	1	0.297222	28	7	0	0	0	0	0	0	0	0	0	10.6	28.2	23.79	0	7.1	2.74	12.7	47.15	5.3	10.5
141	37.9	3170	University graduate	1	0	0	0	2	1	1	0.0270833	39	11	0	0	0	0	0	0	0	1	0	9.9	23.7	16.37	0	13.4	2.91	12.2	47.72	11.4	9.3
142	37.9	3600	University graduate	1	3	0	0	1	1	1	0.132639	28	7	0	0	0	0	0	0	0	3	1	9.9	25.3	26.29	0	9.3	5.83	16.1	70.44	6.7	13.4
143	37.9	3790	University graduate	1	1	0	0	2	1	1	0.124306	84	6	0	0	0	0	0	0	1	2	0	9.9	25.3	25.8	0	21.7	12.91	16.7	64.93	18.9	13.2
144	37.9	3150	University graduate	1	3	0	0	1	1	1	1	44	11	0	0	0	0	0	0	0	0	0	11.1	24.1	28.31	0	8.2	2.91	14.1	107.26	5.8	11.3
145	37.9	3160	University graduate	1	0	0	0	1	1	1	0.977083	67	8	0	0	0	0	0	0	0	0	0	11.5	26.6	24.8	0	8.4	2.6	10.2	30.93	6.5	7.9
146	37.9	3000	Master	1	3	0	0	1	1	0	0.823611	101	9	0	0	0	0	1	0	0	0	0	10.6	28.2	24.84	0	23.2	46.38	14	145.4	21.6	11.8
147	37.9	3530	University graduate	1	2	0	0	2	1	1	0.240278	181	14	0	0	1	0	1	0	0	0	0	10.4	25.5	32.09	0	16.2	25.94	15	71.16	14.6	12.7
148	37.9	3260	University graduate	1	1	0	0	1	1	0	0.0715278	33	7	1	0	1	0	0	0	1	0	0	10.7	23.5	25.1	0	8.9	0.51	9.4	26.72	7.2	7
149	37.9	3350	University graduate	1	0	1	0	1	1	1	0.28125	135	15	0	0	0	0	0	1	1	0	0	10.4	25.8	24.21	0	15.5	7.69	12.4	42.07	13.6	8.8
150	37.9	3160	University graduate	1	1	1	0	1	1	0	0.247222	96	9	0	0	1	0	0	1	0	0	0	11.7	24.5	26.23	0	19.5	0.1	16.6	111.91	17.2	12.7
151	37.9	3990	University graduate	2	0	0	0	2	1	0	0.0159722	23	32	0	0	0	0	0	0	1	0	0	11.7	25.7	29.66	0	11.2	11.9	14.3	98.03	9.5	11.7
152	37.9	3390	University graduate	1	0	2	0	1	1	1	0.197222	134	16	0	1	1	0	0	0	1	1	0	10.7	24.9	30.04	0	8.4	0.9	15.7	69.73	6.1	13.1
153	37.9	3200	University graduate	1	1	0	0	1	1	1	0.15625	55	10	0	0	0	0	0	0	1	0	0	10.8	23.8	22.3	0	7	0.9	10.4	81.51	5	7.2
154	37.9	3490	University graduate	1	1	0	0	2	1	1	0.0333333	99	7	0	0	0	0	0	0	1	0	0	10.5	27.1	26.15	0	8.2	6.3	10.5	74.4	7.1	8.1
155	37.9	3620	Master	1	1	0	0	2	1	0	0.165278	38	12	0	0	1	0	0	0	0	0	0	9.5	25	25.1	0	10.9	12.5	8.2	20.8	9.3	6.7
156	37.9	4100	Trade school	1	3	0	0	2	1	0	0.381944	141	5	0	0	0	0	0	0	0	0	0	10.9	27.3	32.04	0	13	7.9	10.4	125.8	11.7	8.2
157	37.9	3050	University graduate	1	1	0	0	1	1	1	1	111	14	0	0	1	0	0	0	1	0	0	10.4	23.6	26.56	0	20.3	11.5	17	102.41	18.3	13.3
158	37.9	3150	University graduate	1	3	0	0	2	1	1	0.400694	117	8	0	0	0	0	0	0	1	2	0	10.1	24.7	28.66	0	17.7	12.52	13.9	151.05	16.2	12.5
159	37.9	3250	University graduate	1	1	0	0	1	1	1	0	151	4	1	0	0	0	1	0	0	3	1	10.3	22.2	24.8	0	18.6	78.83	9.1	90.43	16.3	6.5
160	37.9	3520	University graduate	1	1	0	0	1	1	1	0.0847222	32	3	0	0	0	0	0	0	1	0	0	10.7	29.1	26.6	0	10	5.4	12.6	29.34	7.6	9.3
161	37.9	3460	University graduate	1	1	0	0	1	1	1	0.352778	69	7	0	0	0	0	0	0	1	3	1	10.6	22.3	21.99	0	7.3	5.93	12.6	74.42	5.7	10.8
162	37.9	3100	University graduate	1	1	2	0	1	2	1	1	83	7	0	0	0	0	0	0	1	0	0	9.6	26.6	21.89	0	7.1	0.63	14.2	32.37	4.5	11.2
163	37.9	2980	University graduate	1	1	0	0	1	1	1	0	49	7	0	0	0	0	0	0	1	3	1	11.7	27.2	20.9		23.1	6.33	17.2	58.5
164	37.9	2970	University graduate	1	0	2	0	1	1	1	0	41	7	0	0	0	0	0	0	0	0	0	9.6	25.1	23.4		15.9	5.06	14.2	55.57
165	37.9	4000	University graduate	1	0	0	0	2	1	1	0	80	5	0	0	1	0	0	0	1	0	0	11	25	18.2		14.3	11.8	12.7	83.31
166	37.9	3100	University graduate	1	0	0	0	1	1	1	0	113	7	0	0	0	0	0	0	1	0	0	11.4	25.7	19.3		12.8	2.21	12.7	44.3
167	37.9	3250	Trade school	1	3	1	0	2	1	1	0	0	0	0	0	0	0	1	1	1	3	1	10.6	26.5	19.4		12.1	6.9	14.5	137.76
168	37.9	3380	University graduate	1	1	0	0	1	1	1	1	146	9	0	0	0	0	0	0	1	0	0	10.6	24.7	23.2		6.9	2.08	9.2	27.82
169	37.9	3690	University graduate	1	1	0	0	2	1	1	0	113	7	0	0	0	0	0	0	0	3	1	9.3	27.1	23.3		7.1	2.39	12.9	81.82
170	37.9	3550	University graduate	1	3	0	0	1	1	1	0	0	0	0	1	0	0	0	0	1	0	0	11.2	27.4	23.6		12.3	54.26	7.5	117.68
171	37.9	3320	University graduate	1	1	0	0	1	1	0	0	49	6	0	0	0	0	0	0	1	0	0	9.8	26.5	20.3		7.9	0.44	10.9	8.99
172	37.9	3470	University graduate	1	0	1	0	2	1	1	0	122	8	0	0	0	0	0	1	0	0	0	11.1	24.6	19.2		10	5.43	8.9	47.59
173	37.9	3830	University graduate	1	1	0	0	2	1	0	1	23	7	0	0	0	0	0	0	0	0	0	10.8	25.7	24.6		13.8	14.98	13.2	88.37
174	37.9	3090	University graduate	1	0	0	0	1	1	0	0	30	5	0	0	1	0	0	0	1	0	0	10.8	25.3	22.1		10.8	5.44	9.4	23.02
175	37.9	3220	University graduate	1	1	0	0	2	1	1	0	147	3	0	0	0	0	0	0	0	0	0	11.5	23.6	22.9		12.2	8.8	10.2	79.78
176	37.9	2960	University graduate	1	1	0	0	2	1	1	1	184	6	0	0	0	0	0	0	0	3	1	10.5	23.9	21		10.7	3.18	15	60.37
177	37.9	3750	University graduate	1	3	4	0	2	1	0	0	0	0	0	0	1	0	1	0	1	3	1	10.7	24.4	22.8		22.3	12	17.2	126.3
178	37.9	3650	University graduate	1	3	0	0	1	1	1	1	0	0	0	0	0	0	0	0	0	0	0	10.9	25.9	15.8		20.5	21.56	16.4	160
179	37.9	3400	University graduate	1	3	1	0	2	1	0	0	0	0	0	0	0	0	0	1	0	0	0	11.2	26.2	20.2		19.6	12.82	13.2	69.42
180	37.9	3050	University graduate	1	3	0	0	2	1	0	0	0	0	1	0	0	0	1	0	1	0	0	11.4	26.7	21.8		15.6	26.7	10.8	74.31
181	37.9	3650	University graduate	1	3	0	0	2	1	0	0	0	0	0	0	0	0	1	0	1	0	0	10.6	26.5	19.8		15.7	69.53	12.9	160
182	37.9	4100	University graduate	1	3	0	0	2	1	0	0	0	0	0	0	0	0	0	0	0	0	0	9.5	25.9	20.2		11.2	14.22	19.8	69.53
183	37.9	3650	University graduate	1	3	0	0	1	1	0	0	0	0	0	1	0	0	0	0	1	0	0	9.5	25.7	27.8		13.7	51.06	10.4	158.22
184	37.9	3150	University graduate	1	3	0	0	1	1	0	1	0	0	0	1	0	0	1	0	1	0	0	11.4	26.2	30.3		20.6	23.02	18.7	160
185	38	2740	University graduate	1	1	2	0	1	1	1	0	0	25	0	0	0	0	1	0	0	0	0	9.9	24.9	23.8	0	14.9	14.4	10.4	54.4	13.1	8
186	38	3500	University graduate	1	1	1	0	2	1	1	1	243	7	0	0	0	0	1	1	1	3	1	10.4	27.9	28.95	0	14.6	29.4	7.4	33.9	12.3	5.2
187	38	3780	University graduate	1	0	0	0	1	1	1	0.264583	41	9	0	0	0	0	0	0	0	3	1	10.1	27.5	30.67	0	14	43.47	13.8	119.34	13.2	11.4
188	38	2780	University graduate	1	2	1	0	1	1	0	0.277083	59	18	0	0	0	0	0	1	0	0	0	11	26.3	28.51	0	16.5	39.17	13	98.05	14.8	11.5
189	38	3300	Master	1	0	1	0	1	1	1	1	155	15	0	0	0	0	0	1	1	0	0	10.1	27.1	24.84	0	14.5	57.02	10.2	88.27	13.2	8.2
190	38	3410	University graduate	1	0	1	0	1	1	1	0.0340278	49	9	0	0	0	0	0	1	1	0	0	10.1	24.6	28.84	0	18.3	9.2	12.3	73.1	16.3	16.3
191	38	3320	University graduate	1	1	0	0	2	1	0	0.452083	96	9	0	0	0	0	1	0	0	3	1	9.9	23.5	27.63	0	19	19.2	21.9	75.6	15.8	15.2
192	38	3250	University graduate	1	3	1	0	1	1	0	0	38	2	0	0	0	0	1	1	1	0	0	10.9	27.5	28.6	0	16.4	18.43	9.4	150.03	14.6	7.6
193	38	3340	University graduate	1	0	0	0	1	1	1	0.159722	45	5	0	0	0	0	0	0	1	0	0	12.4	25.6	24.84	0	14.3	43.35	11.4	38	11.9	8.3
194	38	3610	University graduate	1	1	0	0	1	1	1	0	103	7	1	0	0	0	0	0	1	0	0	9.8	24.4	28.44	0	16.6	28.01	13	35.17	14.7	10.4
195	38	3140	University graduate	1	0	0	0	1	1	1	0.0125	68	2	0	1	0	0	1	0	1	3	1	10.6	26.7	26.35	0	22.6	55.7	12.3	108.65	21.4	9.6
196	38	3800	University graduate	1	3	0	0	2	1	1	0.186111	68	2	0	0	0	0	0	0	0	2	0	10.4	26.5	30.02	0	14.2	2.5	12.8	118.42	12.6	10.9
197	38	3100	University graduate	1	1	1	0	2	1	1	0.284722	180	20	0	0	1	0	0	1	0	3	1	9.9	28.5	25.54	0	4.9	7.15	12.6	80.82	3.6	10.5
198	38	3730	Trade school	1	1	2	0	1	1	1	0.805556	70	10	1	0	0	0	0	0	1	0	0	10.6	26.5	27.39	0	7.6	2.38	14.4	95.4	5.3	11.7
199	38	3080	Master	1	0	1	0	2	1	1	0	111	9	0	0	0	0	0	1	1	0	0	10.4	27.4	31.02	0	18.6	22.02	16	53.37	16.9	13
200	38	3270	University graduate	1	1	0	0	2	1	1	0	62	8	0	0	0	0	0	0	0	0	0	11.2	29.2	25.19	0	7.6	3.91	9.6	56.49	5.2	6.7
201	38	4000	University graduate	1	3	0	0	2	1	1	0	32	12	1	0	0	0	1	0	1	0	0	11.3	27	29.17	0	21.7	51.87	15.2	145.01	19.9	13.8
202	38	3700	University graduate	1	3	1	0	1	1	0	0.165972	68	12	0	0	0	0	1	1	1	2	0	11	27.3	26.04	0	24.2	11.75	27.6	111.1	20.5	23.6
203	38	3980	University graduate	1	1	0	0	2	1	1	0.115972	167	8	0	0	0	0	0	0	1	3	1	11.1	27	27.68	0	7	0.5	14.2	27.03	5.1	11.3
204	38	3810	University graduate	1	1	0	0	2	1	1	0.178472	77	13	0	0	0	0	0	0	0	0	0	10.8	22.9	25.83	0	20.4	18.18	17.1	45.07	18.9	14.6
205	38	3240	University graduate	1	1	1	0	2	1	1	0	44	11	0	0	0	0	0	1	0	0	0	11.6	22.2	29.66	0	8.6	2.16	9.8	35.82	6.1	7
206	38	3420	Master	1	0	0	0	1	1	1	0	77	18	0	0	0	0	0	0	1	0	0	11.9	26.4	26.83	0	8.1	0.76	12.4	36.54	5.9	9.4
207	38	4230	University graduate	1	3	0	0	1	1	0	0.354167	71	9	1	0	0	0	0	0	1	0	0	13	24.3	35.77	0	8	68.87	5.9	88.64	7.4	5.4
208	38	3520	University graduate	1	0	0	0	1	1	1	0.104861	151	9	0	0	0	0	0	0	1	1	0	11.3	23.2	23.22	0	7.8	4.4	9.3	34.35	6.2	7.6
209	38	3900	University graduate	1	3	0	0	2	1	1	0.373611	109	11	0	0	0	0	1	0	1	0	0	10.3	24.4	29.76	0	20.1	19.3	16.3	160	18.4	14
210	38	3180	Master	1	1	3	1	2	1	1	0.292361	181	14	0	0	0	1	1	0	1	3	1	10.9	29	27.46	0	18.7	42.5	15.8	100	16.2	12.6
211	38	3530	University graduate	1	0	0	0	1	1	1	0.0229167	33	7	0	0	0	0	0	0	1	0	0	10.6	26.6	23.63	0	7.5	4	12.4	101.57	5.4	9.5
212	38	3820	University graduate	1	1	0	0	1	1	1	1	154	6	0	0	0	0	0	0	1	3	1	11.4	27.4	27.05	0	15.6	23.89	12.1	55.91	14.3	14.3
213	38	3250	University graduate	1	3	0	0	1	1	0	0	92	10	0	0	0	0	0	0	0	0	0	11.6	21.9	26.17	0	24	3.84	15.2	90.72	22.3	12
214	38	3400	University graduate	1	3	0	0	2	1	1	0.195833	30	9	1	0	1	0	0	0	0	3	1	10.1	25	27.05	0	8.9	9.89	9.3	143.26	7.2	7.5
215	38	3230	Master	2	0	4	0	1	1	0	0	10	5	0	0	0	0（1分钟、5分钟均8分）	1	1	0	0	0	11.3	30.1	23.62	0	7.2	0.69	13.8	20.53	5.3	11.6
216	38	3440	University graduate	1	1	1	0	2	1	0	0.376389	182	3	0	0	0	0	0	1	0	0	0	10.9	23.2	25.97	0	17.3	10.19	11.9	36	15.8	8.7
217	38	3900	University graduate	1	3	1	0	1	1	1	1	7	5	0	0	0	0	1	1	1	3	1	12.1	31.9	25.63	0	7.1	18.76	14.1	160	5.2	11.6
218	38	3120	University graduate	1	1	0	0	1	1	1	0.198611	76	9	0	0	0	0	0	0	0	0	0	11.1	24.4	26.4	0	17.5	3.9	13.1	45.9	15.2	10.6
219	38	3350	University graduate	1	0	1	0	1	1	0	0.765972	141	4	0	0	0	0	0	1	0	0	0	11.7	29.5	24.6	0	15.8	26.17	16.8	70.51	14.9	14
220	38	3430	University graduate	1	0	1	0	1	1	1	0	81	2	0	0	0	0	0	1	1	0	0	10.2	24.5	19.3		17.3	2.45	18.5	40.45
221	38	3560	University graduate	1	1	0	0	1	1	1	0	120	10	0	0	0	0	0	0	1	0	0	11.5	23.8	23.7		10.5	2.5	13.2	97.09
222	38	3250	University graduate	1	1	2	0	1	1	1	0	121	4	0	0	0	0	0	0	1	0	0	111.3	29.7	17.4		9.4	3.3	13.3	48.02
223	38	4080	University graduate	1	3	3	1	2	1	1	0	0	0	0	0	0	1	1	0	1	0	0	11.3	26.7	20.6		21.5	65.67	18.2	152.29
224	38	3780	University graduate	1	1	0	0	1	1	1	1	131	9	1	0	0	0	0	0	0	3	1	11	24.5	20.3		9.3	4.56	11.5	76.52
225	38	2950	University graduate	2	0	0	0	1	1	0	0	5	5	0	0	0	0	0	0	1	2	0	11.3	25.4	19.3		12.2	9.73	9	49
226	38	3300	University graduate	1	3	0	0	2	1	0	1	0	0	0	0	1	0	0	0	0	3	1	11.3	27.1	27.5		16.7	29.08	13.2	114.25
227	38	3710	Trade school	1	1	0	0	2	1	1	0	72	5	0	0	0	0	0	0	1	0	0	10.7	23.8	17.9		13.1	3.58	14.4	25.74
228	38	3150	University graduate	1	3	0	0	1	1	1	0	0	0	0	0	0	0	1	0	0	0	0	11.8	25.9	19.3		13.4	22.13	11.8	214
229	38	3150	University graduate	1	0	1	0	2	1	1	0	66	5	0	0	0	0	0	1	0	0	0	11.6	26.6	22		14.2	3.16	11.8	46.99
230	38	3640	University graduate	1	1	1	0	2	1	1	0	155	5	0	0	0	0	0	1	1	0	0	11.1	25.5	18.8		15.8	10.47	15.5	98
231	38	3370	University graduate	1	2	0	0	1	1	1	1	136	4	1	0	0	0	0	0	1	0	0	10.6	25.2	20		11.9	9.33	11.8	63.73
232	38	3070	University graduate	1	0	0	0	2	1	1	0	39	6	0	0	0	0	0	0	1	0	0	11.4	27.1	24.6		13.5	9.96	14.4	60.3
233	38	3150	University graduate	1	1	0	0	1	1	0	0	122	8	0	0	1	0	0	0	1	0	0	11.2	24.3	16.5		7.1	20.36	13.7	118.42
234	38	3320	University graduate	1	1	0	0	2	1	1	0	64	6	1	0	0	0	1	0	1	3	1	9.5	27	23		8.9	5.56	11.9	43.27
235	38	2690	University graduate	1	1	0	0	1	1	1	0	158	12	0	0	0	0	0	0	0	0	0	9.4	26.1	20.8		15.2	15.16	16.6	99.33
236	38	3150	University graduate	1	1	1	0	2	1	1	1	38	7	0	0	0	0	0	1	0	1	0	11.4	24.3	21.2		17.6	58.1	11.5	95.18
237	38	3900	University graduate	1	3	1	0	1	1	1	0	0	0	0	0	0	0	0	1	0	0	0	10.2	27.7	19.9		14.5	4.54	16.5	123.23
238	38	3150	University graduate	1	3	0	0	1	1	0	0	0	0	0	1	0	0	0	0	1	0	0	9.5	27.9	21.8		12.9	25.61	21.2	83.3
239	38	3920	University graduate	1	1	0	0	2	1	1	0	100	5	1	0	0	0	0	0	1	0	0	11.5	24.3	18.6		14.8	4.82	21.4	60.66
240	38	3630	University graduate	1	1	2	0	1	2	1	0	114	6	1	0	0	0	1	0	0	0	0	10.7	24.1	23.2		14.1	12.6	12.1	80.27
241	38	3960	University graduate	1	1	0	0	1	1	0	1	29	3	0	0	1	0	0	0	1	0	0	11.2	25.7	25.5		15.6	18.88	15.9	44.73
242	38	3450	University graduate	1	3	0	0	2	1	1	1	0	0	0	0	0	0	0	0	1	0	0	10.5	29.9	25.1		15.1	3.52	14	133.51
243	38	3260	University graduate	1	1	1	0	2	1	1	1	116	23	0	0	0	0	0	1	0	2	0	10.9	26.9	22.3		7.9	1	20.8	160
244	38	3300	University graduate	1	1	0	0	1	1	1	0	149	6	0	0	0	0	0	0	0	0	0	10.2	25.7	16		7.9	1.71	10.3	60.46
245	38	4100	University graduate	1	3	1	0	2	1	1	0	0	0	0	0	1	0	1	1	1	0	0	10.7	27.6	20.7		5.8	2.54	10.8	149.92
246	38	4000	University graduate	1	3	1	0	2	1	0	0	0	0	1	0	0	0	0	1	1	0	0	10.2	23.1	20.5		13.3	9.06	12.4	123.08
247	38	3350	University graduate	1	3	1	0	2	1	0	0	0	0	0	0	0	0	0	1	1	2	0	10.7	29.6	26.3		12.5	36.48	10.7	160
248	38	3850	Trade school	1	3	4	0	2	1	0	0	0	0	0	0	0	0	0	0	1	0	0	9.2	25.2	21.9		10.3	14.26	14.9	160
249	38	3750	University graduate	1	3	0	0	1	1	1	0	0	0	0	0	1	0	1	0	1	0	0	11.6	22.8	17.7		21.4	18.17	16.6	124.63
250	38	3300	University graduate	1	2	1	0	1	1	1	0	162	8	0	0	0	0	1	1	1	1	0	10.9	25.6	19.6		15	49.41	12.1	100.17
251	38	3000	University graduate	1	0	4	0	1	1	0	0	65	17	0	0	0	0	0	0	0	3	1	11.3	29.1	19.2		9.4	47.1	10.6	35.11
252	38	3250	University graduate	1	3	0	0	1	1	0	0	0	0	0	0	1	0	1	0	1	0	0	11.7	25.2	24.1		15.6	22.07	12.9	160
253	38	3950	University graduate	1	3	1	0	2	1	0	1	0	0	0	0	0	0	1	1	1	0	0	11.2	24.6	22.4		20.3	63.98	25.1	160
254	38	3850	University graduate	1	3	2	0	2	1	0	0	0	0	0	0	0	0	0	0	0	3	1	10.8	26	20.4		15.9	8.08	10.8	160
255	38	3450	Trade school	2	3	2	0	1	1	1	0	0	0	0	0	0	0	1	0	0	0	0	11.6	23.5	24		16.9	99.15	14.5	160
256	38	3600	University graduate	1	3	1	0	1	1	0	0	0	0	0	0	0	0	1	1	0	0	0	11.3	27.1	22.1		26.6	45.33	22.9	160
257	38	3150	University graduate	1	3	0	0	1	1	1	1	0	0	0	0	0	0	0	0	0	0	0	10.4	24.7	17.5		27	8.38	23.7	97.61
258	38	2900	University graduate	1	3	2	0	1	1	0	0	0	0	0	0	0	0	0	0	0	0	0	11	25.5	17.4		14.1	6.06	12.3	73.96
259	38	3200	University graduate	1	3	0	0	1	1	1	0	0	0	0	0	1	0	1	0	0	0	0	11.3	25.3	18.7		19.9	11.61	13.8	160
260	38	3350	University graduate	1	3	0	0	2	1	1	1	0	0	0	0	1	0	1	0	1	0	0	10.8	23.6	20.5		19.1	57.73	12.2	89.92
261	38	3550	University graduate	1	3	0	0	2	1	0	0	0	0	0	0	0	0	0	0	0	0	0	11.5	23.4	24.3		21	39.37	14.9	88.64
262	38	2950	University graduate	1	3	0	0	1	1	0	0	0	0	1	0	0	0	0	0	1	0	0	10.1	27.7	21.7		16.6	50.64	17.6	86.11
263	38	4000	University graduate	1	3	0	0	2	1	1	0	0	0	0	0	1	0	1	0	0	0	0	10.4	22.8	18.7		18.7	23.98	9.9	112.57
264	38	2790	University graduate	1	0	0	0	1	1	1	0	31	3	0	0	0	0	1	0	0	0	0	10.6	22.6	20.7		20.3	11.89	8.9	23.76
265	38	3100	University graduate	1	3	2	0	2	1	1	0	0	0	0	0	0	0	1	0	1	0	0	11.9	31.5	16.9		15.6	7.58	7.4	77.39
266	38	3650	University graduate	1	3	0	0	2	1	1	0	0	0	0	0	0	0	1	0	1	0	0	12.3	31.6	23.5		18.6	25.11	16.3	115.06
267	38	3900	Trade school	1	3	0	0	2	1	0	0	0	0	0	0	1	0	1	0	1	3	1	11.9	26.8	25.1		19.1	36.14	12.4	160
268	38	3580	University graduate	1	3	0	0	2	1	1	0	0	0	0	0	0	0	1	0	1	0	0	11.5	23.4	19.8		17.5	27.86	13.4	125.68
269	38	3300	University graduate	1	3	0	0	1	1	0	0	0	0	0	1	0	0	1	0	1	0	0	11.3	29.1	23.4		14.2	8.01	8.6	55.31
270	38	2420	Trade school	1	2	6	0	1	1	1	0	42	8	1	0	0	0	1	0	1	1	0	11.5	22.7	22.4		12.5	10.28	8.3	55.9
271	38	3300	University graduate	1	3	0	0	1	1	1	1	0	0	0	0	1	0	1	0	1	0	0	10.7	25.3	19		15.6	9.04	14.1	66.3
272	38	3200	University graduate	1	3	1	0	1	1	1	1	0	0	1	0	0	0	0	1	0	0	0	10.5	24.1	24.8		10.7	2.46	15.2	131.13
273	38	3650	University graduate	1	3	1	0	2	1	1	0	0	0	0	0	0	0	1	1	1	0	0	11.5	26.4	19.8		18.3	9.29	13.4	128.23
274	38.1	3650	University graduate	1	1	0	0	2	1	1	0	162	8	0	0	1	0	0	0	1	1	0	10.1	27.1	24.6	0	14.2	14.9	13.7	63.2	12.6	10.3
275	38.1	3750	University graduate	1	1	0	0	1	1	1	1	94	7	0	1	0	0	0	0	1	0	0	9.6	27.2	31.03	0	18	19.34	12.6	31.42	15.8	9.6
276	38.1	2660	University graduate	1	0	0	0	1	1	1	0.325	138	7	0	0	0	0	0	0	1	0	0	9.7	24.4	28.24	0	8	2.86	18.3	61.11	5.8	14.9
277	38.1	3800	University graduate	1	3	2	0	1	1	0	0.806944	138	7	0	1	0	0	0	0	0	0	0	10.1	25.3	38.2	0	17.8	13.15	10.6	158.99	16.2	8.8
278	38.1	3400	University graduate	1	1	0	0	2	1	1	0.820139	41	9	0	0	0	0	0	0	1	0	0	10.7	25.9	29.24	0	16.9	11	9.7	46	15.3	7.2
279	38.1	3260	University graduate	1	0	0	0	1	1	1	0.348611	72	8	0	0	0	0	0	0	0	3	1	10.4	24	33.16	0	16.3	6.62	14.9	34.96	13.7	11.2
280	38.1	3400	University graduate	1	3	0	0	2	1	1	0	213	8	0	0	0	0	1	0	0	3	1	10.6	25.4	27.55	0	15.8	63.98	12.6	166.55	14.4	10.8
281	38.1	3700	University graduate	1	1	0	0	1	1	1	0	198	2	0	0	0	0	0	0	1	0	0	10.4	27.7	28.9	0	13.9	8.4	12.9	62.56	12	9.8
282	38.1	3850	University graduate	1	3	0	0	2	1	1	0.395139	119	16	0	0	0	0	0	0	0	0	0	10.8	31.5	25.95	0	14.3	20.19	9.9	82	12.2	7.6
283	38.1	4750	University graduate	1	3	6	0	1	1	1	0.305556	87	18	1	0	1	0	1	0	1	2	0	10.8	25.5	28.16	0	14.6	34.3	13.3	110.02	12.5	11.6
284	38.1	3400	University graduate	1	1	0	0	1	1	1	0.491667	94	7	0	1	0	0	0	0	1	0	0	11	27.7	25.25	0	9.9	5	13.7	86.28	8.1	11.1
285	38.1	3370	University graduate	1	1	0	0	2	1	1	0.0729167	105	15	0	0	0	0	0	0	0	1	0	10.8	25.7	26.95	0	7.6	2.24	11.2	78.55	6.1	9
286	38.1	3700	University graduate	1	3	0	0	1	1	0	1	86	14	0	0	0	0	1	0	0	0	0	11	25.4	26.56	0	14.7	4.65	14	132.11	11.8	11.6
287	38.1	3280	University graduate	1	1	0	0	2	1	1	0.136111	33	7	0	0	0	0	0	0	1	0	0	10.5	26.9	25.78	0	11.9	8.9	10.3	37.1	9.4	7.6
288	38.1	2880	University graduate	1	0	0	0	2	1	1	1	60	6	1	0	1	0	0	0	1	0	0	10.5	24.4	23.42	0	20	18.9	10.8	28.6	18.5	8.7
289	38.1	3280	University graduate	1	1	0	0	1	1	1	1	59	21	0	0	0	0	1	0	0	0	0	10.5	22.5	26.26	0	12.5	5.4	7	33	11.4	4.7
290	38.1	3300	University graduate	1	1	0	0	1	1	1	0.930556	92	10	0	0	0	0	0	0	0	3	1	10.2	26.7	24.25	0	12.3	34.16	14.8	97.39	11.2	12.3
291	38.1	3580	University graduate	1	3	1	0	2	1	1	1	103	7	0	0	0	0	1	1	0	0	0	10.1	26.7	24.25	0	18.2	82.8	16.6	128.6	16.3	14.3
292	38.1	3280	University graduate	1	0	0	0	1	1	1	0.290972	159	6	0	0	0	0	0	0	1	0	0	10.2	25.1	24.06	0	11.3	3.86	10.3	33.57	9.7	8
293	38.1	3480	University graduate	1	3	3	1	1	1	1	0	0	0	0	0	0	1	0	0	1	0	0	10.5	22.9	17.9		10.1	57.55	11.8	160
294	38.1	3100	University graduate	1	3	0	0	2	1	1	0	0	0	0	0	0	0	1	0	0	3	1	11	24	19.9		23.4	13.53	28	60.94
295	38.1	3160	University graduate	1	1	2	0	1	1	1	0	31	6	0	1	1		0	0	0	0	0	11.7	26.4	20.4		13.6	32.34	13.5	98.82
296	38.1	3650	University graduate	1	1	0	0	2	1	1	1	68	7	0	0	0	0	0	0	0	3	1	10	23.4	18.6		22.7	12.35	13.9	50.9
297	38.1	3110	University graduate	1	1	0	0	2	1	1	0	68	9	0	0	0	0	0	0	1	0	0	12	28.6	24.2		18.9	8.56	11.5	60.96
298	38.1	2840	University graduate	1	0	0	0	1	1	1	0	55	5	0	0	0	0	0	0	1	0	0	10.9	25.3	19.2		11.2	9	14	92.37
299	38.1	3890	University graduate	1	0	0	0	2	1	0	0	0.0326389	12	0	1	0	0	0	0	0	0	0	12.4	25.2	17.9		14.9	14.43	14	90.42
300	38.1	3550	University graduate	1	3	0	0	2	1	0	0	0	0	0	1	0	0	1	0	0	0	0	11.4	27.8	22.1		13.2	21.69	11.4	160
301	38.1	3420	University graduate	1	0	1	0	2	1	1	0	92	5	0	0	0	0	0	1	1	3	1	11.2	29.5	21.6		15.4	16.98	13.6	76
302	38.1	3250	University graduate	1	0	1	0	2	1	1	0	80	8	0	0	0	0	0	1	1	1	0	10.8	26.2	19.9		9.1	7.26	12.7	42.99
303	38.1	3200	University graduate	1	3	0	0	2	1	1	1	0	0	0	0	0	0	1	0	1	0	0	9.7	26.8	22.2		11.7	13.44	11.7	160
304	38.1	3350	University graduate	1	3	0	0	1	1	1	1	0	0	0	0	0	0	0	0	0	0	0	11.5	23.4	26.3		7.2	2.07	9	123.58
305	38.1	2750	Trade school	1	1	0	0	1	1	1	0	49	6	0	0	0	0	0	0	1	0	0	11.3	25.3	22		7.7	2.96	19.4	130.88
306	38.1	3340	University graduate	1	0	2	0	1	1	1	0	97	3	1	0	0	0	0	0	0	0	0	10.5	24.3	23		9	1.25	8.8	79.45
307	38.1	3270	University graduate	1	1	0	0	2	1	1	0	59	6	0	0	1	0	1	0	0	0	0	10	23.3	18.6		11.8	17.13	11	68.19
308	38.1	3030	University graduate	1	1	0	0	1	1	1	1	200	5	0	0	0	0	0	0	0	0	0	10.5	26.8	18.7		12.7	4.37	15.6	82.53
309	38.1	3450	University graduate	1	3	1	0	1	1	0	1	0	0	0	0	0	0	1	1	1	0	0	9.9	24.2	19.1		8.9	14.05	7.8	160
310	38.1	3370	University graduate	1	2	0	0	1	1	1	0	112	8	0	0	0	0	1	0	1	0	0	11	25.4	17.7		19.7	60.34	15.5	144.09
311	38.1	3600	University graduate	1	3	0	0	1	1	1	1	0	0	0	0	0	0	1	0	1	0	0	10.5	26.7	22.1		21	10.54	12.3	69.75
312	38.1	3500	University graduate	1	3	0	0	2	1	0	0	0	0	0	0	0	0	1	0	0	3	1	11.2	27.6	18.2		13.8	10.6	11.6	120.45
313	38.1	3000	University graduate	1	3	0	0	1	1	0	1	0	0	0	0	0	0	0	0	0	0	0	11.3	26.6	19.9		14.1	6.54	12.8	63.92
314	38.1	3450	University graduate	1	3	0	0	1	1	1	1	0	0	0	0	0	0	1	0	0	0	0	9.4	23.5	20.7		19.6	10.81	20.7	64.27
315	38.1	3500	University graduate	1	3	1	0	1	1	1	0	0	0	1	0	0	0	1	1	1	0	0	11.5	23.8	23.5		16	11.55	15.5	160
316	38.1	3550	University graduate	1	2	0	0	2	1	1	0	160	5	0	0	0	0	0	0	1	0	0	11.4	25.6	18.8		15.3	6.57	12.3	76.87
317	38.1	3650	University graduate	1	3	1	0	2	1	0	0	0	0	0	0	1	0	1	1	1	0	0	11	27.4	22.3		17	3.18	11.6	82.98
318	38.1	3900	University graduate	1	3	1	0	2	1	1	1	0	0	0	0	0	0	1	1	0	0	0	10.4	26.1	20.8		16.9	36.51	17.6	124.61
319	38.1	4150	University graduate	1	3	0	0	1	1	1	1	0	0	0	0	0	0	1	0	1	0	0	9.9	26	20.1		17.4	23.4	10.3	66.14
320	38.1	3000	University graduate	1	1	0	0	2	1	1	0	129	6	0	0	0	0	1	0	1	3	1	10.9	26.2	17.9		16.6	11.64	9.1	54
321	38.1	3600	University graduate	1	0	0	0	1	1	1	0	133	17	0	0	0	0	0	0	0	3	1	9.7	27.6	20		17.5	7.64	14.1	71.79
322	38.1	3600	University graduate	1	3	1	0	2	1	1	0	0	0	0	0	0	0	0	1	0	0	0	11.5	27.1	22.7		12	10.5	11.9	160
323	38.2	3490	University graduate	1	1	0	0	1	1	1	0.343056	149	6	0	0	0	0	0	0	0	1	0	10.6	28.8	35.65	0	21	72.6	17.7	115.8	18.9	14.8
324	38.2	3260	Master	1	0	0	0	1	1	0	0	66	9	0	0	0	0	1	0	0	0	0	9.1	26.3	26.15	0	9.5	2.71	10.3	22.36	6.9	7
325	38.2	3050	University graduate	1	3	0	0	1	1	1	1	28	7	0	0	1	0	1	0	1	3	1	10.6	26.8	28.2	0	15.6	20.66	10.8	152.25	14.4	9.1
326	38.2	3950	University graduate	1	3	0	0	2	1	0	0.0548611	211	23	0	0	1	0	1	0	0	2	0	11.6	31.6	29.21	0	8.9	25.7	10.1	160	7.4	8.5
327	38.2	2960	Master	1	2	0	0	1	1	1	0.0569444	24	6	0	0	0	0	0	0	1	3	1	9.6	28.2	23.43	0	10.3	5	15.6	75.7	7.9	13.2
328	38.2	3750	University graduate	1	0	0	0	1	1	0	1	46	9	0	0	0	0	0	0	0	0	0	10.5	25.3	26.07	0	16.4	16.48	13.7	29.69	13.5	10.6
329	38.2	3830	University graduate	1	1	1	0	2	1	0	1	63	32	0	0	1	0	1	1	1	3	1	10.6	26.6	34.1	0	15.6	10.7	15.8	75.02	14.3	14.1
330	38.2	3550	Master	1	3	0	0	2	1	0	0.770833	67	8	0	0	0	0	0	0	1	3	1	10.1	29.1	29.35	0	9	20.22	9.8	106.7	7.4	8.2
331	38.2	3520	Master	1	0	0	0	2	1	1	0	78	17	0	0	0	0	0	0	1	1	0	11.9	25.8	28.51	0	14.2	34.09	12.4	84.9	11.6	9.6
332	38.2	2660	Master	1	0	0	0	2	1	1	0	58	7	0	0	0	0	0	0	0	0	0	11	27.1	27.88	0	7.4	14.21	14	49.89	4.4	11
333	38.2	3470	Master	1	2	2	0	2	1	1	0.38125	154	16	1	0	0	0	0	0	0	3	1	10.8	25.3	29.29	0	24.5	12.7	13.6	45.06	22.2	11.2
334	38.2	3050	University graduate	1	0	1	0	2	1	1	0.113194	33	7	0	0	0	0	0	1	0	0	0	9.6	27.5	30	0	8.4	3.56	12.3	69.13	6.3	9.8
335	38.2	4120	University graduate	2	0	0	0	1	2	0	0.30625	36	9	1	0	1	0	0	0	1	0	0	11	24.1	27.76	0	7.6	1.4	11.2	60.66	4.6	8.2
336	38.2	3670	Trade school	1	3	1	0	2	1	1	0.295833	134	16	0	0	0	0	1	1	1	0	0	12.1	24	29.4	0	18.8	20.8	14.8	160	16.5	12.2
337	38.2	4250	University graduate	1	3	1	0	2	1	0	0.471528	16	9	0	0	0	0	1	1	1	3	1	11	25.9	29.17	0	16.8	16.66	16	160	14.4	13.9
338	38.2	2990	University graduate	1	1	1	0	1	1	1	0.320139	166	9	0	0	1	0	0	1	1	0	0	11.6	25.1	24.41	0	11.6	6.32	17.1	113.65	9.1	13.9
339	38.2	3960	Master	1	2	0	0	2	1	0	0.25	60	20	0	0	0	0	1	0	1	0	0	11.2	30.1	28.9	0	20.4	34.75	17	39.55	18.7	14.1
340	38.2	3480	University graduate	1	1	3	1	2	1	1	0.331944	109	11	0	0	0	1	1	0	1	3	1	11.8	32.9	26.49	0	13.7	45.9	9.9	68.1	12.3	8.1
341	38.2	3550	Master	1	3	0	0	2	1	1	0	12	8	0	0	1	0	1	0	1	2	0	10.2	23.8	27.96	0	10.6	2.9	8.9	96.8	9	6.6
342	38.2	4120	University graduate	1	1	0	0	2	1	1	0	113	7	0	0	0	0	0	0	0	0	0	9.8	25.1	27.38	0	12.9	15.94	9.1	105.18	10.8	6.7
343	38.2	3470	University graduate	1	1	1	0	1	1	1	0.152778	140	25	0	0	0	0	0	1	0	0	0	10.6	28.8	28.12	0	20	29.95	16.8	106	17.2	14.2
344	38.2	2100	Master	1	1	1	0	1	1	0	0.0840278	51	9	0	1	0	0	0	1	1	0	0	9.3	22.5	23.3	1	13.9	14.99	13.7	60.17	12.6	11.3
345	38.2	3550	University graduate	1	3	0	0	2	1	1	1	182	6	0	0	0	0	0	0	0	0	0	9.8	27	30.04	0	15.8	14	13.8	118.02	13.4	10.8
346	38.2	3250	University graduate	1	3	1	0	2	1	1	1	7	5	1	0	0	0	1	1	0	0	0	9.8	25.2	28	0	18.1	77.5	10.7	137.1	16.2	8.5
347	38.2	3620	University graduate	1	1	0	0	2	1	1	0.361111	265	5	0	0	0	0	0	0	1	3	1	12	27.4	24.6	0	12.1	33.8	11.6	88.9	10.4	9.6
348	38.2	3250	University graduate	1	3	0	0	2	1	0	0.765972	24	6	0	0	0	0	0	0	0	0	0	9.9	24.9	23.93	0	16.3	18.22	14.4	78.23	14.4	12.2
349	38.2	3500	University graduate	1	1	0	0	2	1	1	0	213	7	0	0	0	0	0	0	0	0	0	10.7	27.3	18		9.7	18.22	11	58.83
350	38.2	3450	University graduate	1	3	0	0	1	1	1	1	0	0	1	0	0	0	1	0	1	3	1	10.8	26.2	27.2		15.7	12.55	11.8	85.89
351	38.2	3850	University graduate	1	3	2	0	1	1	0	0	0	0	1	0	0	0	1	0	1	0	0	10.2	24.9	27.6		13.8	17.17	11	99.14
352	38.2	3760	University graduate	1	2	0	0	2	1	1	0	161	9	0	0	0	0	1	0	1	0	0	11	27.7	22		11.9	30.38	10.3	92.92
353	38.2	3830	University graduate	1	1	1	0	1	1	1	1	148	10	0	0	0	0	0	1	1	0	0	11.5	24.2	23.3		19.3	46.41	13	119.29
354	38.2	3620	University graduate	1	1	0	0	2	1	1	0	197	3	0	0	0	0	0	0	1	0	0	11.1	26.9	17.6		13.1	6.44	13.5	62.06
355	38.2	3700	University graduate	1	1	0	0	2	1	1	0	179	11	0	0	0	0	1	0	1	1	0	10.5	24.2	18		10.4	2.24	12.1	72.58
356	38.2	3420	University graduate	1	0	1	0	2	1	1	0	65	5	0	0	0	0	0	1	0	0	0	11.8	29.2	21.3		17.4	22.94	14.9	67.45
357	38.2	3720	University graduate	1	2	0	0	1	1	1	1	98	2	1	0	0	0	0	0	0	0	0	11.1	27.4	19.1		11.6	2.91	16.9	54.85
358	38.2	3170	University graduate	1	2	1	0	2	1	1	0	211	9	0	0	0	0	1	1	0	0	0	10.9	24.9	17.5		20.1	7.49	24.7	95.78
359	38.2	3780	University graduate	1	1	0	0	2	1	1	0	149	2	0	0	0	0	0	0	0	3	1	11.4	24.6	21.4		7.8	0.91	14.2	20
360	38.2	3520	University graduate	1	1	2	0	1	1	0	0	161	9	0	0	0	0	0	0	1	0	0	10.9	26.2	18.8		22	3.72	13.6	22.47
361	38.2	3450	University graduate	1	3	2	0	1	1	1	0	0	0	1	0	0	0	1	0	0	0	0	9.5	23.7	29.7		19.8	84.11	15.5	160
362	38.2	3550	University graduate	1	3	0	0	2	1	1	0	0	0	0	0	0	0	1	0	1	0	0	9.5	25.9	21.2		13.3	17.14	11.7	143.97
363	38.2	3550	University graduate	1	1	0	0	2	1	1	0	35	13	1	0	0	0	0	0	0	0	0	11.5	25.1	25.4		18.8	19.75	14.6	123.04
364	38.2	2950	University graduate	1	3	0	0	1	1	0	1	0	0	0	0	1	0	1	0	1	0	0	11	23.7	17.4		11.5	2.11	13.1	122.63
365	38.2	3090	University graduate	1	1	0	0	2	1	1	0	120	5	0	0	0	0	0	0	0	0	0	10.9	26.1	19.8		8.1	0.5	12.9	34.56
366	38.2	3060	University graduate	1	0	0	0	1	1	1	0	37	13	0	0	0	0	0	0	0	1	0	9.4	24.5	19		12.2	12.55	12.8	88.4
367	38.2	2940	University graduate	1	1	0	0	1	1	1	0	40	21	0	0	0	0	0	0	0	3	1	9.9	23.3	20.3		9.6	2.47	8.5	19.7
368	38.2	3880	University graduate	1	0	1	0	1	1	1	0	75	4	0	0	0	0	0	1	0	0	0	10.6	25.9	27.3		12.6	22.48	17.4	78.82
369	38.2	3300	University graduate	1	3	0	0	1	1	1	1	0	0	0	0	0	0	0	0	1	0	0	10.1	27.3	19.1		11.1	7.85	9.3	105.11
370	38.2	3000	University graduate	1	3	0	0	1	1	1	1	0	0	0	0	0	0	1	0	0	0	0	11.7	27.8	21.3		24.4	4.39	17.3	124.71
371	38.2	3480	University graduate	1	1	0	0	1	1	1	0	237	6	0	0	0	0	1	0	1	3	1	11.5	22.6	19.2		10.8	17.15	11.7	103.64
372	38.2	3290	University graduate	1	1	0	0	2	1	1	0	198	7	0	0	0	0	1	0	1	1	0	10.7	26.6	19.8		11.8	6.36	10.3	29.69
373	38.2	3350	Trade school	1	3	0	0	2	1	0	1	0	0	0	0	0	0	1	0	1	0	0	10.6	29.4	21.8		20.3	12.29	19	77.91
374	38.2	3000	University graduate	1	3	0	0	1	2	1	1	0	0	1	0	0	0	1	0	1	0	0	10.2	27.3	26		21.7	33.61	24.5	92.7
375	38.2	3000	University graduate	1	3	0	0	1	1	1	1	0	0	0	0	0	0	1	0	1	0	0	9.7	21.7	20.6		18.7	90.43	12.1	148.07
376	38.2	2940	University graduate	1	2	1	0	2	1	1	0	8	2	0	0	0	0	1	1	1	3	1	9.9	25.2	21.9		16.1	23.34	11.4	58.75
377	38.2	3100	University graduate	1	3	0	0	1	1	1	1	0	0	0	0	0	0	0	0	0	0	0	12.4	27.9	20.9		11.7	15.55	12.1	142.25
378	38.2	3470	Trade school	1	2	2	0	1	1	1	1	181	4	0	0	0	0	0	0	0	1	0	10.6	26.6	21.6		13.6	29.87	12.1	117.73
379	38.2	3750	University graduate	1	3	0	0	2	1	1	0	0	0	0	0	0	0	0	0	1	0	0	10.7	23.4	19.2		17.9	58.6	8	99.39
380	38.2	2800	University graduate	1	2	1	0	1	1	0	1	63	7	0	0	1	0	1	1	1	0	0	10.5	25.5	18.1		7	2.5	24.2	112.8
381	38.2	3850	University graduate	1	3	1	0	2	1	1	0	0	0	0	0	0	0	1	1	1	0	0	11.3	26	23.7		18.8	30.33	9.8	114.23
382	38.2	3970	University graduate	1	2	4	0	2	1	0	0	149	17	0	0	1	0	0	0	1	1	0	11.3	25.3	21.3		22.5	35.8	13.7	47.61
383	38.2	3570	University graduate	1	3	0	0	1	1	0	0	0	0	0	0	0	0	1	0	1	0	0	10.8	31.3	24		14	21.5	10.8	104.83
384	38.2	2850	University graduate	1	3	2	0	1	1	1	0	0	0	0	0	0	0	1	0	1	0	0	11.3	22.2	19		16.6	29.66	15.5	108.11
385	38.2	3350	University graduate	1	3	1	0	1	1	0	1	0	0	0	0	0	0	1	1	0	0	0	9.4	22.9	21.3		19.6	14.68	14.2	138.58
386	38.2	3750	University graduate	1	2	0	0	1	1	1	0	127	8	1	0	0	0	0	0	0	3	1	11.6	25.7	30		15.7	14.5	11.2	71.04
387	38.2	3500	University graduate	1	3	0	0	2	1	0	0	0	0	0	0	0	0	1	0	0	0	0	9.9	24.1	23.5		15.4	36.76	14.4	160
388	38.2	3400	University graduate	1	3	0	0	2	1	1	1	0	0	0	0	0	0	1	0	0	3	1	11	23.3	32.2		16.1	35.03	13.3	86.49
389	38.2	3900	University graduate	1	3	0	0	1	1	1	0	0	0	0	0	0	0	1	0	1	2	0	11	24.1	19.7		16.2	42.91	11.4	144.48
390	38.2	3680	University graduate	1	2	0	0	1	1	1	0	218	12	0	0	0	0	1	0	0	0	0	11.2	25.9	20.4		14.2	23.35	13.3	87.34
391	38.3	3040	University graduate	1	1	1	0	1	1	1	1	124	5	0	0	0	0	1	1	0	3	1	10.2	24.8	25.91	0	17.1	91.1	14	64.8	15.7	10.9
392	38.3	2980	University graduate	1	1	4	0	1	1	1	0.965972	191	4	0	0	0	0	1	0	0	0	0	10.5	24.7	25.15	0	12.8	29.77	13.3	66.1	11.2	10.7
393	38.3	3810	Master	1	1	1	0	2	1	1	0	60	10	0	0	0	0	0	1	1	0	0	10.1	25.5	26.22	0	19.7	10.47	21	52.16	18.3	18.3
394	38.3	3230	Master	1	0	0	0	1	1	1	0.1875	105	10	0	0	0	0	0	0	1	0	0	10.1	24.6	27.39	0	18.3	9.2	16.3	113.4	16.3	12
395	38.3	3580	University graduate	1	0	0	0	2	1	1	0.0104167	65	10	0	0	0	0	0	0	0	0	0	9.8	23.7	25.93	0	9	3.1	9.7	64	7.1	7.6
396	38.3	3420	University graduate	1	3	1	0	1	1	1	1	101	9	0	0	0	0	1	1	1	0	0	11.5	24.4	28.22	0	16.8	29.65	12	114.85	15.5	10.4
397	38.3	3630	University graduate	1	1	0	0	2	1	1	0.388194	84	6	0	0	1	0	0	0	0	0	0	10.9	23.3	24.73	0	7.3	0.1	12.3	39.03	5.5	9.1
398	38.3	3620	University graduate	1	0	0	0	2	1	1	1	38	12	0	0	1	0	0	0	1	0	0	10.5	28.4	30.75	0	18.6	16.4	10.4	79.9	16.9	8.1
399	38.3	3420	University graduate	1	2	1	0	2	1	1	0	184	6	0	0	0	0	0	1	0	0	0	10.1	28.4	24.21	0	7.6	2.58	9	67.1	5.7	6.7
400	38.3	2960	University graduate	1	1	4	0	1	1	1	0.19375	129	8	0	0	0	0	0	0	1	0	0	10.2	27.3	23.73	0	13.8	8.3	15.5	44.12	11.8	12.3
401	38.3	2980	University graduate	1	2	0	0	1	1	0	0.124306	34	6	0	0	0	0	1	0	1	3	1	10.5	25.6	28.28	0	13	9.08	15.8	106.69	11.2	12.3
402	38.3	3620	University graduate	1	1	1	0	2	1	1	0.246528	95	5	0	0	0	0	0	1	1	0	0	9.9	23.5	6	0	12.7	13.5	11.2	84.3	10.8	8.6
403	38.3	3420	Master	1	1	0	0	2	1	1	0.452083	201	9	0	0	1	0	0	0	1	0	0	10.3	25	27.91	0	5.1	2.36	8.8	88.8	3.5	6.3
404	38.3	3450	Trade school	1	3	0	0	2	2	1	0.260417	32	3	0	0	0	0	1	0	1	0	0	9.8	27.5	26.05	0	15.2	24.2	11.6	125	14.1	10.3
405	38.3	2850	University graduate	1	3	0	0	1	1	1	0.909722	117	8	0	0	0	0	0	0	0	0	0	10.2	26.5	25.4	0	12.6	8.91	9.9	91.98	11.2	7.5
406	38.3	3220	University graduate	1	1	0	0	2	1	1	0.497917	75	5	0	0	0	0	1	0	0	3	1	10.3	27.6	25	0	18.6	76.41	14	80.25	16.5	11.2
407	38.3	3470	University graduate	1	0	0	0	1	1	1	0	94	13	0	0	0	0	0	0	0	0	0	11.5	23.2	21.2		18	7.02	21.8	11.81
408	38.3	3740	University graduate	1	1	1	0	1	1	1	1	33	7	0	0	0	0	0	1	1	3	1	11.2	25.3	22.8		16.6	8.75	16.5	83.83
409	38.3	3730	University graduate	1	3	0	0	2	2	1	0	0	0	1	0	0	0	1	0	0	0	0	10.9	24	25.2		17.1	62.92	15.4	133.85
410	38.3	3060	University graduate	1	1	0	0	1	1	1	1	161	3	0	0	0	0	0	0	1	0	0	10.8	26.6	16.9		9.7	5.94	11.7	67.21
411	38.3	3300	University graduate	1	3	0	0	2	1	1	0	0	0	0	0	0	0	1	0	1	1	0	11.3	25.5	21		16.8	7.8	12.1	156.27
412	38.3	3980	University graduate	1	3	0	0	2	1	0	0	0	0	1	0	0	0	0	0	0	0	0	11	24.3	22		11.9	15.42	14.9	115.41
413	38.3	3210	University graduate	2	0	0	0	1	1	1	0	6	9	0	0	0	0	0	0	0	0	0	11.3	22.2	18		14.9	4.53	9.8	23.61
414	38.3	3230	University graduate	1	1	1	0	1	1	1	0	29	3	0	1	0	0	0	1	1	0	0	10.9	24.5	20.2		16.1	6.39	23.4	50.12
415	38.3	2790	University graduate	1	1	0	0	1	1	1	1	115	10	0	1	0	0	0	0	0	2	0	10.6	27.5	22.1		22.6	23.86	17.4	39.87
416	38.3	3450	University graduate	1	3	0	0	1	1	0	0	0	0	0	0	0	0	1	0	1	0	0	9.8	27.5	19.4		11	65.56	13.1	160
417	38.3	4150	University graduate	1	3	0	0	1	1	0	1	0	0	1	0	0	0	0	0	1	0	0	11	28.1	22		9	1.5	27	8.78
418	38.3	3000	University graduate	1	1	0	0	1	1	1	0	94	4	0	0	1	0	0	0	1	0	0	10.7	26.3	19.5		22	6.37	13.9	32.24
419	38.3	3950	University graduate	1	3	0	0	2	1	1	0	0	0	0	0	0	0	0	0	1	3	1	10.8	26.4	20.8		12.2	8	17.1	126.35
420	38.3	3750	University graduate	1	1	2	0	2	1	1	0	261	9	0	0	0	0	0	0	0	0	0	11.2	26.6	23.4		20.9	5.21	17.1	63.26
421	38.3	3650	University graduate	1	3	1	0	1	1	1	1	0	0	1	0	1	0	0	1	1	0	0	10.4	27.5	20.5		15.8	43.05	14.1	155.89
422	38.3	3730	University graduate	1	2	1	0	1	1	1	1	86	9	0	0	0	0	0	1	1	0	0	11.8	25.5	26		14.2	20.46	12.4	160
423	38.3	3050	University graduate	1	3	0	0	1	1	1	1	0	0	0	0	1	0	0	0	0	0	0	11.2	24.4	26.1		15.4	13.49	12.7	145.13
424	38.3	4050	University graduate	1	3	1	0	1	1	1	1	0	0	0	0	0	0	1	1	1	0	0	10.3	26	18.5		21.8	29.41	8.3	105.34
425	38.3	3970	University graduate	1	3	0	0	1	1	1	1	0	0	0	0	0	0	1	0	0	3	1	10.8	27	26.9		12.9	14.98	12.9	117.44
426	38.3	3800	University graduate	1	3	0	0	2	1	1	0	0	0	0	0	0	0	0	0	0	0	0	11	24.5	19.9		13	5.39	13.6	132.17
427	38.3	3900	University graduate	1	3	1	0	2	1	1	0	0	0	0	0	0	0	0	1	1	0	0	10.8	24.7	24.4		9.8	8.24	9.8	106.64
428	38.3	4100	Trade school	1	3	0	0	1	1	0	0	0	0	0	0	0	0	1	0	1	0	0	11.3	24	23.8		18.9	8.19	15.9	160
429	38.3	3850	University graduate	1	3	0	0	2	1	0	0	0	0	0	0	0	0	1	0	1	3	1	10.1	29.5	20		13	6	12.3	95.44
430	38.3	3700	University graduate	1	3	0	0	2	1	1	1	0	0	0	0	0	0	1	0	1	3	1	11.6	25.3	18.3		14.4	49.76	12.3	94.39
431	38.3	3950	University graduate	1	3	1	0	2	1	1	0	0	0	0	0	0	0	1	1	1	0	0	12	27.2	19.9		17.5	10.21	15.2	99.93
432	38.3	3520	University graduate	1	3	1	0	2	1	1	0	0	0	0	0	0	0	0	1	0	1	0	11	23.9	23.6		11.6	5.06	12.6	138.24
433	38.3	3000	University graduate	1	3	0	0	1	1	1	1	0	0	0	0	1	0	1	0	0	0	0	11.2	23.7	21.7		11.6	130.04	8.5	149.14
434	38.4	3900	University graduate	1	3	3	1	2	1	0	0	60	9	0	0	0	1	0	0	1	0	0	10.2	24	29.55	0	16.2	3.55	8.8	93.85	13.5	6.4
435	38.4	3280	University graduate	1	0	0	0	1	1	1	0.0548611	89	16	0	0	0	0	0	0	0	0	0	11.1	26.3	27.36	0	15.5	10.4	15.4	65.7	13.9	13
436	38.4	4020	University graduate	1	1	0	0	1	1	1	0.125694	211	23	0	0	0	0	0	0	0	0	0	10.4	26.4	31.26	0	16.1	4.1	17.5	50.5	14.2	15.1
437	38.4	3260	University graduate	1	1	0	0	1	1	1	0.104861	53	14	0	1	1	0	0	0	0	0	0	10.8	23.3	33.64	0	16.9	5.55	10.9	80.15	14.5	8.7
438	38.4	3360	University graduate	1	1	0	0	1	1	1	0.222222	94	5	0	0	0	0	0	0	1	0	0	9.7	25.4	27.81	0	6.8	1.93	8.2	54.92	4.6	5.5
439	38.4	3730	University graduate	1	3	0	0	1	1	1	0.240972	96	4	0	0	0	0	1	0	1	3	1	9.6	24.8	27.05	0	11.7	2.2	18.1	53.05	9.4	15.8
440	38.4	3020	University graduate	1	1	0	0	1	1	1	0.833333	139	11	0	0	0	0	0	0	1	0	0	10.7	26.2	24.4	0	17.5	4.12	12.1	28.97	15.7	9.5
441	38.4	3480	Doctor	1	0	0	0	2	1	0	0	44	11	0	0	0	0	0	0	0	0	0	10.7	26.2	30.11	0	19.1	18.65	19.6	101.17	16.5	15.8
442	38.4	3310	University graduate	1	0	1	0	1	1	1	0.168056	102	8	0	0	0	0	0	1	1	0	0	9.9	26	28.76	0	14.4	2.74	12.2	20.82	12.9	9.7
443	38.4	2900	University graduate	1	2	0	0	1	1	1	0	165	6	0	0	0	0	1	0	1	0	0	9.8	22.4	24.15	0	15.6	16.02	12.8	37.07	13.3	10.6
444	38.4	3500	Master	1	3	3	1	1	2	0	0	141	4	1	0	1	1	1	0	1	3	1	10.9	25	27.53	0	9.8	49	10.3	160	8.7	8.7
445	38.4	4000	University graduate	1	3	1	0	2	1	1	0	0	0	0	0	0	0	0	1	1	3	1	11.8	26.3	22.4		10.9	6.13	11.3	89.68
446	38.4	2960	University graduate	1	0	0	0	2	1	1	0	52	18	0	0	1	0	0	0	1	0	0	9.4	25.6	19.9		17.7	2.07	15.4	69.62
447	38.4	3430	University graduate	1	1	3	1	2	1	1	0	188	7	1	0	0	1	0	0	0	3	1	10.8	26.6	20		13.5	10.08	11.2	59.6
448	38.4	3350	University graduate	1	3	0	0	1	1	1	0	0	0	0	0	0	0	0	0	1	0	0	11.6	24.2	20.1		14.4	14.39	16	160
449	38.4	3760	University graduate	1	0	0	0	1	1	1	0	77	7	0	0	0	0	1	0	1	0	0	9.9	25.1	22.5		14.2	12	8.2	65.17
450	38.4	3870	University graduate	1	2	0	0	2	1	1	0	132	13	0	0	0	0	0	0	1	0	0	9.9	25.8	18.7		14.9	17.56	9.9	87.83
451	38.4	3480	University graduate	1	2	4	0	2	1	1	1	45	5	0	0	0	0	1	0	0	0	0	10.8	24.5	19.1		12.3	99.47	11	144.82
452	38.4	3450	University graduate	1	3	0	0	1	1	1	0	0	0	0	0	0	0	1	0	0	0	0	10.5	25	19.1		20.9	16.55	17.8	160
453	38.4	2750	University graduate	1	3	0	0	1	1	1	0	0	0	1	0	0	0	1	0	0	0	0	10.7	28.7	21.7		24.1	59.44	21.3	172.87
454	38.4	3730	University graduate	1	2	1	0	2	1	1	0	44	6	1	0	0	0	1	1	1	0	0	10.9	25.2	25.5		19.3	82.91	14.1	121.83
455	38.4	3500	University graduate	1	2	0	0	2	1	1	0	56	5	0	0	0	0	1	0	1	0	0	11.4	27.1	22.4		14.8	6.74	11.8	69.45
456	38.4	3400	University graduate	1	3	0	0	1	1	1	1	0	0	0	0	0	0	1	0	1	0	0	10.6	25.2	21.7		18.5	39	14.4	114.44
457	38.4	4300	University graduate	1	3	0	0	2	1	0	0	0	0	0	0	0	0	0	0	0	0	0	10.5	24	20.7		14.6	13.53	16	153.74
458	38.4	3350	University graduate	1	3	1	0	2	1	1	0	0	0	0	0	0	0	1	1	0	0	0	11.2	26.5	25.1		21.1	18.25	16.7	120.51
459	38.4	3150	University graduate	1	3	0	0	2	1	1	1	0	0	0	0	0	0	1	0	0	0	0	11.02	25.4	17		12.3	1.79	10.6	62.73
460	38.4	3490	University graduate	1	3	3	1	2	1	1	0	0	0	0	0	0	1	1	0	1	3	1	9.1	25	19.3		18.2	28	13.6	121.22
461	38.4	4050	University graduate	1	3	0	0	2	1	1	0	0	0	0	0	0	0	0	0	1	0	0	11.6	25.8	21		10.2	5.69	10	117.53
462	38.4	3650	Trade school	1	3	1	0	2	1	1	0	0	0	0	0	1	0	0	1	0	0	0	11.6	25	19.5		15.6	7.13	11.8	160
463	38.4	3090	University graduate	1	2	0	0	2	1	1	0	33	6	0	0	0	0	0	0	1	0	0	11.9	26.3	17.1		14.5	5.14	15.8	46.47
464	38.5	3450	Trade school	1	3	0	0	2	1	1	0.256944	83	7	1	0	0	0	1	0	1	3	1	10.1	22.8	24.76	0	14.7	33.8	14.9	116.5	12.5	11.8
465	38.5	3580	University graduate	1	0	0	0	1	1	1	0.9375	57	3	1	0	1	0	1	0	1	0	0	10.1	23.7	29.27	0	16.9	19.44	12.4	94.52	14.7	9.4
466	38.5	3680	University graduate	1	0	0	0	1	1	1	0	100	10	0	0	0	0	0	0	0	0	0	11	24.6	33.98	0	14.6	26.81	9.8	156.64	13.2	8
467	38.5	4360	University graduate	1	1	1	0	2	1	1	0	107	3	0	0	0	0	0	1	1	3	1	10.8	27.7	27.01	0	9.8	6.18	14.6	85.98	8.1	12.3
468	38.5	3550	Trade school	1	2	0	0	1	1	1	0.215278	50	5	0	0	0	0	1	0	1	3	1	10.9	27.4	25.07	0	16.3	11	12.7	67.2	12.9	9.7
469	38.5	3620	University graduate	1	2	0	0	2	1	1	0	41	14	0	1	0	0	1	0	1	3	1	10.5	26.4	27.91	0	18.3	9.2	12.3	73.1	10.3	10.3
470	38.5	3600	University graduate	1	3	1	0	2	1	0	1	96	9	1	0	0	1	1	1	0	0	0	11.1	27.7	30.01	0	20.6	59.1	20.9	107.3	18.9	18.7
471	38.5	3960	Master	1	2	3	1	2	1	1	0.106944	59	6	0	0	0	0	0	0	1	0	0	10.5	26	23.88	0	7.4	9.04	11.1	68.87	5.3	9.1
472	38.5	3770	University graduate	1	1	0	0	2	1	1	1	255	5	0	0	0	0	0	0	0	2	0	10.4	25.6	28.93	0	10.9	2.8	9.8	10.8	9.3	7.5
473	38.5	3100	Trade school	3	0	0	0	1	1	0	0.924306	6	9	0	0	0	0	1	0	0	3	1	11.7	31.5	27.67	0	13.3	20.94	12.1	55.91	11.2	10
474	38.5	3750	University graduate	1	3	1	0	1	1	1	0.425694	92	25	0	0	0	0	1	1	0	0	0	10.2	29	31.61	0	23.1	8.63	22.4	159.69	21.9	19.5
475	38.5	3700	University graduate	1	3	0	0	1	1	1	0.215278	10	5	0	0	1	0	1	0	0	3	1	10.2	25.3	30.44	0	11.5	8.04	12.5	160	10	10.7
476	38.5	2410	University graduate	1	2	2	0	1	1	1	0	119	6	0	0	0	0	1	0	0	0	0	11.6	25.7	18.8		15.9	6.2	9.7	53.89
477	38.5	3540	University graduate	1	1	0	0	1	1	1	0	43	7	0	0	0	0	1	0	1	0	0	11.1	26.8	17.5		17.5	15.72	14.5	29.22
478	38.5	3810	University graduate	1	0	0	0	1	1	1	0	126	9	0	0	0	0	0	0	1	0	0	10.9	27.1	21.8		16	12.91	16.4	80.63
479	38.5	3600	University graduate	1	3	1	0	2	1	0	0	0	0	0	0	0	0	1	1	1	0	0	11.1	23.4	21		10.5	3.87	17.5	160
480	38.5	3070	University graduate	1	1	0	0	1	1	1	0	98	7	0	0	0	0	1	0	1	0	0	10.9	29.2	19.7		12	13.01	11.4	37.42
481	38.5	3180	Trade school	1	0	3	1	1	2	1	0	106	9	0	0	0	1	0	0	1	0	0	11.3	26	23.5		14.5	12.4	15.2	78.8
482	38.5	3610	University graduate	1	2	0	0	2	1	1	0	113	12	0	0	0	0	1	0	1	0	0	10.9	26.5	22		16.9	11.85	12.3	148.73
483	38.5	3300	University graduate	1	3	0	0	1	1	1	0	0	0	0	0	0	0	1	0	1	0	0	10.8	23.6	21.2		18.9	15.43	21.6	160
484	38.5	3290	Trade school	1	3	4	0	2	1	1	0	0	0	0	0	0	0	1	0	0	1	0	11	31.7	19.5		11.2	17.87	14.3	160
485	38.5	4000	University graduate	1	3	0	0	1	1	1	1	0	0	0	0	0	0	1	0	1	0	0	11.2	27.4	23.6		18.2	67.89	19.8	160
486	38.5	3150	University graduate	1	3	1	0	1	1	1	0	0	0	0	0	0	0	1	1	1	2	0	10.5	25.6	17.2		17.2	16	15.9	105.73
487	38.5	3350	University graduate	1	3	0	0	2	1	1	0	0	0	0	0	0	0	0	0	1	0	0	11.5	23.2	21.4		19.6	22.96	20.7	44.38
488	38.5	3650	Trade school	1	3	1	0	1	1	1	0	0	0	1	0	0	0	1	1	1	1	0	10.3	23.4	18.3		14.1	19.63	12.3	160
489	38.5	3310	University graduate	1	1	0	0	2	1	1	0	36	4	0	0	0	0	1	0	0	2	0	10.7	27	19.4		15.8	5.58	12.5	41.46
490	38.5	3000	Trade school	1	3	0	0	2	1	1	0	0	0	0	0	0	0	1	0	0	0	0	11.1	24.4	19.5		13.9	53.28	13.4	160
491	38.5	3430	University graduate	1	2	0	0	1	1	1	0	74	6	0	1	0	0	0	0	0	0	0	10.8	25.8	24.6		17	10.98	11.5	55.03
492	38.6	3380	University graduate	1	1	0	0	2	1	1	0.258333	77	3	0	0	0	0	0	0	1	0	0	9.9	33.3	24.24	0	18.4	45.29	14.2	86.33	17	11.9
493	38.6	3300	University graduate	1	1	0	0	2	1	1	0.234028	118	7	0	0	0	0	1	0	0	3	1	10.2	20.4	27.68	0	15	38.4	11.5	73.15	13.2	9.1
494	38.6	3840	Trade school	1	1	2	0	2	1	0	0.340278	60	5	0	0	1	0	0	0	1	0	0	10.6	23.1	26.1	0	19.6	5.29	13.2	101.72	18.4	11.3
495	38.6	3550	University graduate	1	0	0	0	1	1	1	0	124	11	0	0	0	0	1	0	1	3	1	9.4	25.7	26.96	0	13.7	20	13.5	77.98	12.4	10.8
496	38.6	3550	Master	1	3	4	0	1	1	0	0.414583	117	13	0	0	0	0	0	0	0	0	0	10.8	27.3	26.49	0	18.7	11.15	15.9	89.75	17.2	14.1
497	38.6	3900	University graduate	1	0	1	0	2	1	0	0	97	13	0	0	0	0	1	1	1	0	0	10.7	29.2	27.63	0	23.7	40.3	24.4	104	21.7	21.6
498	38.6	2780	University graduate	1	2	1	0	2	1	1	1	14	6	0	0	0	0	0	1	1	3	1	9.7	27.4	30.45	0	15.7	32.91	13.2	110.33	14.2	14.2
499	38.6	4200	University graduate	1	3	1	0	2	1	1	0	0	0	0	0	0	0	1	1	1	0	0	11.7	24.3	20.5		23.2	8.21	10.8	84.57
500	38.6	3430	University graduate	1	2	2	0	1	1	0	0	38	7	0	0	0	0	0	0	1	0	0	12.6	27.2	24.9		10.1	71.01	12.2	104.21
501	38.6	2630	Trade school	1	0	0	0	1	2	0	0	2	8	0	0	0	0	0	0	0	0	0	10.3	23	23.5		15.5	37.84	10	118.68
502	38.6	3900	Trade school	2	0	0	0	1	1	0	0	16	14	0	0	0	0	0	0	1	0	0	11.4	31.6	21.6		14.1	39.34	13.2	112.46
503	38.6	3780	University graduate	1	2	0	0	2	1	1	0	70	10	0	0	1	0	1	0	1	0	0	11.9	25.1	20.2		22.3	10.48	18.9	108
504	38.6	2790	University graduate	1	3	4	0	1	1	0	0	0	0	0	0	0	0	0	0	1	0	0	12.1	29.4	17.3		9.5	87.18	7.6	86.98
505	38.6	3350	University graduate	1	3	0	0	2	1	1	0	0	0	0	0	0	0	1	0	1	0	0	10.3	25.5	22		14.3	9.03	13	147.63
506	38.6	3400	University graduate	1	3	2	0	1	1	1	0	0	0	0	0	0	0	1	0	1	0	0	11.7	24.6	21.4		14.3	1.8	21	92.54
507	38.6	4300	Trade school	1	3	1	0	2	1	1	0	0	0	0	0	1	0	0	1	1	0	0	11.5	26.7	19.5		22	24.5	18.6	160
508	38.7	3350	Master	1	3	0	0	2	1	1	0.370833	175	10	0	0	0	0	1	0	0	0	0	12.4	26.7	30.45	0	13.1	29.18	14.2	160	11.4	12
509	38.7	3590	University graduate	1	1	0	0	1	1	0	0.447222	179	11	0	0	0	0	1	0	1	0	0	11.5	26	27.68	0	10.3	19.52	18.3	157.84	8	14.6
510	38.7	3350	University graduate	1	3	1	0	1	1	1	0.363889	111	14	0	0	0	0	1	1	1	0	0	10.3	30.2	23.73	0	11.4	9.3	9.9	119	9.7	8
511	38.7	3610	University graduate	1	1	2	0	2	1	1	0	97	8	0	0	0	0	0	0	0	1	0	9.5	23.8	30.79	0	17.5	43.39	15.9	87.62	15.7	12.2
512	38.7	3200	University graduate	1	1	0	0	1	1	1	0.328472	143	7	0	0	0	0	0	0	1	0	0	10.7	20.2	30.79	0	13.5	9.3	15.1	65.1	11.1	11.9
513	38.7	3100	University graduate	1	3	0	0	1	1	1	0.230556	59	6	0	0	1	0	0	0	0	3	1	10.3	24.4	24.43	0	13	13.4	13.4	160	11.6	11.5
514	38.7	3990	University graduate	1	1	1	0	2	1	1	0	128	7	0	0	0	0	1	1	0	0	0	11.4	24.3	21.6		10.5	34.2	11.2	130.02
515	38.7	3000	University graduate	1	0	1	0	1	1	1	0	80	7	0	0	0	0	0	1	1	0	0	11.1	26.6	18.3		17.5	12.78	19	48.32
516	38.7	3900	Trade school	1	3	0	0	2	1	0	0	0	0	0	1	0	0	1	0	1	0	0	10.8	33.8	20.2		10.4	34.87	10.9	160
517	38.7	2900	University graduate	1	3	0	0	2	1	1	0	0	0	0	0	0	0	1	0	1	3	1	10.6	25.8	20.7		14.8	29.76	16.3	125.36
518	38.7	4080	University graduate	1	3	0	0	2	1	1	0	0	0	0	1	0	0	1	0	1	0	0	11.2	24.5	24		21.8	38.71	21.2	160
519	38.7	2930	University graduate	1	1	2	0	1	1	1	0	113	7	0	0	0	0	0	0	0	0	0	9.2	26.3	21.2		8.5	2.5	10.6	20.2
520	38.7	3400	University graduate	1	3	1	0	2	1	1	0	0	0	0	0	0	0	1	1	1	0	0	10.9	25.3	19.5		13.3	4.84	13.5	106.03
521	38.7	3870	University graduate	1	2	1	0	1	1	1	0	111	19	0	0	0	0	1	1	1	0	0	14.8	38.9	17.5		16.7	2.44	19.2	66.7
522	38.7	3620	University graduate	1	2	0	0	1	1	1	0	116	4	0	0	0	0	0	0	1	3	1	11	26.2	20.7		14.8	11.93	12.7	110.34
523	38.7	3630	University graduate	1	2	0	0	1	1	1	1	52	3	0	0	0	0	0	0	0	0	0	11.5	27.2	18.4		11.7	4.11	11.8	47.07
524	38.8	3650	Trade school	1	3	0	0	2	1	1	0.949306	107	8	1	0	0	0	1	0	1	0	0	10.1	27.7	30.88	0	17.6	47.2	15.7	160	16	12.8
525	38.8	3270	University graduate	1	1	2	0	2	1	1	0.202778	107	8	0	0	0	0	1	0	0	0	0	10.8	29.5	25	0	15.2	13.29	18.6	60.24	12.8	15.3
526	38.8	2950	University graduate	1	3	0	0	1	1	1	0.0986111	151	9	0	1	0	0	1	0	1	0	0	11.2	25.4	26.6	0	12.7	20.18	11.1	133.16	11.1	9.1
527	38.8	4310	University graduate	1	1	0	0	1	1	1	0	126	4	0	0	0	0	0	0	1	0	0	9.9	22.6	26.1	0	11.9	4.35	9.3	57.77	10.6	7.4
528	38.8	4000	University graduate	1	3	0	0	2	1	1	0	0	0	0	0	1	0	1	0	0	1	0	11.4	28.6	26.4		12.5	46.21	15.3	160
529	38.8	3580	University graduate	1	2	0	0	2	1	1	0	63	7	0	0	0	0	0	0	1	0	0	10.4	29.3	18.8		14.4	10.32	16.3	65.7
530	38.8	3260	University graduate	1	1	0	0	1	1	1	0	85	5	0	0	0	0	0	0	0	0	0	11.2	25.9	21.9		20.7	18.26	13.3	80.37
531	38.8	3250	University graduate	1	3	1	0	2	1	0	1	0	0	0	0	0	0	1	1	0	0	0	11.3	25.2	24.3		16	12.86	14.4	160
532	38.9	3300	University graduate	1	2	3	1	1	1	1	0.276389	133	7	0	0	0	1	1	0	1	0	0	11.2	25.8	27.36	0	18.7	16.04	17.2	120.43	16.1	14.3
533	38.9	3450	University graduate	1	3	0	0	2	1	1	0.266667	44	11	0	0	0	0	1		0	0	0	10.9	25.7	25.39	0	13.5	7.13	14.7	118.35	11.6	12.7
534	38.9	3350	University graduate	1	1	0	0	2	1	1	0.304167	103	7	0	0	0	0	0	0	0	0	0	10.8	25.8	27.3	0	13.4	10.6	9.2	37.2	11.8	6.6
535	38.9	3900	University graduate	1	3	2	0	2	1	1	1	59	6	0	0	0	0	1	0	0	0	0	10.8	24.6	28	0	11.3	12.53	13.3	114.53	10.1	11
536	38.9	3300	University graduate	1	2	1	0	2	1	1	0	47	3	0	0	0	0	1	1	1	0	0	10.2	23.8	18.7		9.2	5.75	12.7	103
537	38.9	3190	University graduate	1	1	0	0	1	1	1	0	63	7	0	0	0	0	0	0	0	0	0	11.4	26.8	18.7		11	7.73	10.4	105.37
538	39	3590	University graduate	1	2	1	0	2	1	1	0.411111	107	8	0	0	1	0	1	1	1	2	0	10.8	33.5	24.97	0	14.1	48.9	11	136.6	12.1	8.4
539	39	3400	University graduate	1	0	0	0	1	1	0	0.213889	78	22	0	0	1	0	0	0	1	0	0	10.5	26.9	24.24	0	10.2	1.31	13.7	33.85	7.7	10.8
540	39	3900	University graduate	1	3	0	0	2	1	0	0.423611	182	3	0	0	0	0	1	0	1	0	0	10.1	25.8	30	0	12.8	9.08	18.8	160	11.5	17.8
541	39	4350	University graduate	1	3	0	0	2	1	1	1	0	0	0	0	0	0	1	0	1	0	0	10.2	27	19.6		14.9	43.91	13.5	99.6
542	39	3350	Trade school	1	3	0	0	2	1	1	0	0	0	0	0	0	0	1	0	1	0	0	10.5	28.1	22		5.3	51.73	30.8	160
543	39	3200	University graduate	1	3	1	0	2	1	1	0	0	0	0	0	0	0	0	1	1	1	0	11.8	36.1	20.8		17.9	4.63	24	131.41
544	39	3670	University graduate	1	2	3	1	1	1	0	0	127	7	0	0	0	1	1	0	1	0	0	11.3	25.3	24.2		14.5	4.34	13.9	144.13
545	39	3250	University graduate	1	3	0	0	2	1	1	0	0	0	1	0	0	0	0	0	1	3	1	11.7	23.4	24.8		24.4	27.21	19.5	160
546	39	3600	University graduate	1	3	0	0	1	1	1	0	0	0	1	0	0	0	1	0	0	0	0	10.7	26.7	23.9		13.6	13.39	12.1	110.33
547	39	3300	University graduate	1	2	0	0	2	1	1	0	106	9	0	0	1	0	1	0	1	0	0	10.1	26.9	27.3		13.1	15.9	15.1	59.4
548	39	3250	University graduate	1	3	1	0	1	1	1	0	0	0	1	0	1	0	1	1	1	0	0	10.9	28.2	18.4		11	13.1	11.4	123.82
549	39	3650	University graduate	1	3	0	0	2	1	1	0	0	0	0	0	0	0	1	0	1	0	0	9.6	25.6	18.4		21.5	16.36	24	160
550	39	3950	University graduate	1	3	0	0	2	1	1	0	0	0	0	0	0	0	1	0	1	3	1	10.8	23.3	22.4		15	7	16.7	160
551	39.1	3820	University graduate	1	0	0	0	1	1	1	0.335417	43	7	0	0	0	0	0	0	1	0	0	10.2	23.8	23.87	0	9.3	4.7	10.7	65.5	7.4	8.2
552	39.1	3340	Master	1	1	0	0	1	1	1	1	90	7	0	0	1	0	1	0	0	0	0	10.2	20.4	27.21	0	15	38.4	11.5	73.15	13.2	13.2
553	39.1	3880	University graduate	1	2	1	0	2	1	1	0	69	14	0	0	0	0	1	1	1	3	1	12.4	24.3	28.2		15.4	30.63	15.9	154.68
554	39.1	3660	University graduate	1	2	1	0	2	1	1	0	140	5	0	0	0	0	1	1	0		0	10.8	25.5	20.2		16.6	10.66	18.9	151.32
555	39.1	3650	University graduate	1	1	1	0	2	1	1	0	133	7	0	0	0	0	0	1	1	0	0	11.7	26.2	21.2		12.8	21.86	11.6	78.92
556	39.1	3830	University graduate	1	1	1	0	1	1	1	0	22	8	0	0	0	0	1	1	0	0	0	10.7	24.7	23.3		17.4	17.74	12.5	70.8
557	39.2	3080	University graduate	1	1	0	0	2	1	1	0.475	64	11	0	0	0	0	1	0	0	0	0	9.5	24	26.61	0	18.5	30.83	17.8	82.26	17.2	15.3
558	39.2	3280	Master	1	0	0	0	2	1	1	0.0590278	85	10	0	0	0	0	0	0	1	0	0	11.4	27.4	25.11	0	14.6	13.41	14.3	40.43	13	11
559	39.2	3400	University graduate	1	3	1	0	2	1	1	0	0	0	0	0	0	0	1	1	1	0	0	11.2	24.9	16.3		17.7	15	19.4	140.5
560	39.2	3850	University graduate	1	3	0	0	1	1	1	0	0	0	0	0	0	0	1	0	0	0	0	10.9	27.3	19.4		14.1	8.67	18.3	160
561	39.2	4200	Trade school	2	3	1	0	1	2	1	0	0	0	1	0	0	0	1	1	1	0	0	11.3	22.2	28.6		11.2	7.36	10.1	160
562	39.2	3000	University graduate	1	3	1	0	2	1	0	0	0	0	0	0	0	0	1	1	0	0	0	11.1	25.6	13.8		13.8	24.45	14.4	160
563	39.2	4460	Trade school	1	2	3	1	2	1	1	0	145	5	0	0	0	1	1	0	0	0	0	9.9	23.7	18.8		20.8	44.02	30.9	122.55
564	39.3	3750	Master	1	3	1	0	1	1	0	0	181	14	0	0	0	0	1	1	1	0	0	10.5	23.2	29.58	0	15.5	22.04	16	177.32	14	14.7
565	39.3	2520	University graduate	1	1	0	0	1	1	0	0	53	7	0	0	0	0	1	0	0	3	1	9.3	26.8	20.8		15	3.37	23.3	114.11
566	39.4	3860	University graduate	1	1	0	0	1	1	1	0.767361	175	10	0	0	0	0	1	0	1	0	0	11.4	27.9	28.71	0	13.3	21.26	16	101.29	12.5	13.2
567	39.4	3450	University graduate	1	3	0	0	2	1	1	0.180556	62	8	0	0	0	0	1	0	0	1	0	10.6	25.7	25.34	0	12	22.02	11.1	160	10.7	8.3
568	39.4	3080	University graduate	1	2	0	0	2	2	1	0	123	12	0	0	0	0	1	0	0	2	0	9.8	29.8	25		18.1	36.4	15.6	63.02
569	39.4	2900	University graduate	1	3	0	0	1	1	1	0	0	0	0	0	1	0	0	0	1	0	0	9.8	27.9	21.1		16.2	8.13	15.1	160
570	39.5	3100	University graduate	1	3	0	0	1	1	1	1	0	0	0	0	0	0	0	0	1	1	0	10.4	29.5	25		14.8	10.19	17.9	106
571	39.5	3970	University graduate	1	2	1	0	2	1	1	0	41	9	0	0	0	0	1	1	0	0	0	10.6	24.5	19.5		14.7	6.51	15.4	88.4
572	39.6	3580	University graduate	1	2	3	1	1	1	1	0	118	7	0	0	0	1	1	0	1	0	0	10.3	24.9	29.17	0	16.9	4.7	17.6	96	15.6	16.1
573	39.6	3750	University graduate	1	3	1	0	1	1	1	0.320833	53	14	0	0	0	0	0	1	0	3	1	10.5	26.9	28.63	0	11.3	49.87	10.8	80.15	9.9	9.9
574	39.9	3950	University graduate	1	3	0	0	2	1	1	0	0	0	1	0	0	0	0	0	1	3	1	10.1	28.8	18.8		11.3	5.18	11.1	74.31
575	40.3	3100	University graduate	1	3	1	0	1	1	1	0	0	0	0	0	0	0	1	1	0	0	0	11.8	29.7	23.4		11.4	42.4	9.1	145.6
